1 **Single cell dynamics of embryonic muscle progenitor cells in zebrafish**

2

3 Priyanka Sharma<sup>1</sup>, Tyler D. Ruel<sup>1</sup>, Katrinka M. Kocha<sup>1</sup>, Shan Liao<sup>2</sup>, and Peng Huang<sup>1\*</sup>

4

5 <sup>1</sup>Department of Biochemistry and Molecular Biology, Cumming School of Medicine, Alberta  
6 Children's Hospital Research Institute, University of Calgary, 3330 Hospital Drive, Calgary AB  
7 T2N 4N1, Canada

8

9 <sup>2</sup>Inflammation Research Network, The Snyder Institute for Chronic Diseases, Department of  
10 Microbiology, Immunology and Infectious diseases, Cumming School of Medicine, University  
11 of Calgary, 3330 Hospital Drive, Calgary AB T2N 4N1, Canada

12

13 \*Correspondence should be addressed to P.H.

14

15 Email: [huangp@ucalgary.ca](mailto:huangp@ucalgary.ca)

16 Tel: 403-220-4612

17

18 **Running title:**

19 Single cell dynamics of dermomyotome

20

21 **Keywords:**

22 Dermomyotome, Somite, Muscle progenitor cells, *In vivo* imaging, Extracellular matrix,

23 Zebrafish

24

25 **Summary statement:**

26 Live imaging and single cell clonal analysis reveal dynamic behaviors of zebrafish embryonic

27 muscle progenitor cells in quiescence and activation.

28 **ABSTRACT**

29

30 Muscle stem cells hold a great therapeutic potential in regenerating damaged muscles.  
31 However, the *in vivo* behavior of muscle stem cells during muscle growth and regeneration is  
32 still poorly understood. Using zebrafish as a model, we describe the *in vivo* dynamics and  
33 function of dermomyotome cells, a population of embryonic muscle progenitor cells.  
34 Dermomyotome cells are located in a superficial layer external to muscle fibers and express  
35 many extracellular matrix (ECM) genes including *col1a2*. Utilizing a new *col1a2* transgenic  
36 line, we show that dermomyotome cells display a ramified morphology with dynamic cellular  
37 processes. Cell lineage tracing demonstrates that *col1a2<sup>+</sup>* dermomyotome cells contribute to  
38 normal muscle growth as well as muscle injury repair. Combination of live imaging and single  
39 cell clonal analysis reveals a highly-choreographed process of muscle regeneration.  
40 Activated dermomyotome cells change from the quiescent ramified morphology to a polarized  
41 and elongated morphology and generate daughter cells that fuse with existing muscle fibers.  
42 Ablation of the dermomyotome severely compromises muscle injury repair. Our work  
43 provides a dynamic view of embryonic muscle progenitor cells during zebrafish muscle  
44 regeneration.

## 45 INTRODUCTION

46

47 Tissue-resident stem cells are crucial for proper organ development and tissue  
48 homeostasis. Skeletal muscles possess remarkable ability to regenerate. To harness the  
49 power of stem cells for treatment of diseases such as muscular dystrophy, it is critical to  
50 understand how muscle progenitor cells behave *in vivo*. In vertebrates, skeletal muscles  
51 originate from the somites (Saga and Takeda, 2001). As the embryo develops, the ventral  
52 somite forms the sclerotome, generating progenitors of the axial skeleton and tendons,  
53 whereas the dorsolateral somite forms the dermomyotome. The dermomyotome further splits  
54 to form the dermatome and the myotome, which contribute to the formation of the skin and  
55 skeletal muscles, respectively (Christ and Scaal, 2008; Scaal and Christ, 2004). Thus, the  
56 dermomyotome contains embryonic muscle progenitor cells required for the initial formation  
57 and growth of the musculature. Fate mapping and lineage tracing experiments in mouse and  
58 chick have demonstrated that the dermomyotome is also the source of adult muscle stem  
59 cells known as satellite cells (Gros et al., 2005; Kassar-Duchossoy et al., 2005; Relaix et al.,  
60 2005; Schienda et al., 2006).

61 Both the dermomyotome (embryonic muscle progenitor cells) and satellite cells (adult  
62 muscle stem cells) contribute to muscle fiber formation, and are marked by the expression of  
63 the paired box transcription factors *Pax3* and *Pax7* (Dumont et al., 2015; Scaal and Christ,  
64 2004). However, the function and dynamics of satellite cells have been more extensively  
65 studied than those of the dermomyotome. Quiescent satellite cells often display a bipolar  
66 morphology and reside beneath the basal lamina on the surface of the muscle fiber (Scharner  
67 and Zammit, 2011; Webster et al., 2016). The extracellular matrix (ECM) surrounding the  
68 satellite cell constitutes its niche and has been implicated in the regulation of satellite cell  
69 behavior (Baghdadi et al., 2018; Bentzinger et al., 2013b; Fry et al., 2017; Rayagiri et al.,  
70 2018; Tierney et al., 2016; Urciuolo et al., 2013). In the event of muscle injury, “activated”  
71 satellite cells undergo proliferation and initiate the myogenic program. The sequential  
72 expression of myogenic regulatory factors, including *Myf5*, *MyoD*, and *Myogenin*, results in  
73 the differentiation of myoblasts that align and form new syncytial muscle fibers or fuse with  
74 existing myofibers. A single transplanted satellite cell is capable of self-renewal and  
75 contribute to muscle fibers (Sacco et al., 2008). Conversely, genetic ablation of satellite cells

76 in adult mice completely abolishes injury-induced muscle regeneration (Lepper et al., 2011;  
77 Murphy et al., 2011; Sambasivan et al., 2011), demonstrating a critical role of satellite cells in  
78 maintaining muscle homeostasis.

79 It has been challenging to visualize the *in vivo* behavior of satellite cells. Previous work  
80 has been mostly inferred from “snapshots” of histological sections or analysis from *in vitro*  
81 cultures (Bentzinger et al., 2014; El Fahime et al., 2000; Jockusch and Voigt, 2003; Kuang et  
82 al., 2007; Siegel et al., 2009). For example, time-lapse imaging in a 3D myofiber culture  
83 system has shown that activated satellite cells are highly dynamic and migrate along the  
84 muscle fiber by extending unipolar or bipolar cellular protrusions (Siegel et al., 2009).  
85 However, muscle stem cells that are separated from their physiological environment are  
86 invariably activated, and *in vitro* approaches therefore do not provide the whole picture of  
87 their endogenous behavior. With the advance of intravital imaging, recent work provides the  
88 first glimpse of mouse satellite cell behavior *in vivo* (Webster et al., 2016). Quiescent satellite  
89 cells are largely immobile, while activated satellite cells proliferate and migrate along the  
90 ECM remnants of injured myofibers during regeneration. This work highlights the importance  
91 of *in vivo* approaches to study muscle stem cells.

92 The remarkable regenerative ability and the ease of *in vivo* imaging have made  
93 zebrafish a powerful system to study muscle stem cell behavior (Ratnayake and Currie,  
94 2017). The zebrafish dermomyotome, also known as the external cell layer (ECL), is  
95 marked by the expression of *pax3* and *pax7*, similar to higher vertebrates (Devoto et al.,  
96 2006; Feng et al., 2006; Hammond et al., 2007). During somitogenesis, *pax3/pax7*<sup>+</sup>  
97 dermomyotome is generated from the anterior somitic compartment through whole-somite  
98 rotation and is thought to generate new muscle fibers during myotome growth (Hollway et  
99 al., 2007; Stellabotte et al., 2007). At 4-5 days post-fertilization (dpf), some *pax7*<sup>+</sup> muscle  
100 progenitor cells can be observed deep in the myotome between muscle fibers (Seger et al.,  
101 2011). Therefore, *pax7* labels at least two populations of muscle progenitor cells in  
102 zebrafish embryos: first embryonic muscle progenitor cells in the dermomyotome on the  
103 surface of the somite, and later fiber-associated deep myotomal cells, some of which have  
104 been shown to be functionally equivalent to mammalian satellite cells (Gurevich et al.,  
105 2016). Although *pax7*<sup>+</sup> muscle progenitor cells have been shown to contribute to muscle  
106 injury repair (Gurevich et al., 2016; Knappe et al., 2015; Pipalia et al., 2016; Seger et al.,

107 2011), the behavior and contribution of early muscle progenitor cells from the  
108 dermomyotome has not been specifically explored due to the lack of specific reporters.

109 In this study, we developed new transgenic tools and methods to analyze the dynamics of  
110 dermomyotome cells at single cell resolution. We identified a number of ECM genes as new  
111 markers of dermomyotome cells. Genetic lineage tracing using *col1a2*-based transgenic lines  
112 demonstrated that dermomyotome cells contribute not only to embryonic muscle growth but  
113 also to injury repair. Using *in vivo* imaging and single cell clonal analysis, we described the  
114 dynamics of “quiescent” and “activated” dermomyotome cells. Together, our study provides a  
115 dynamic view of embryonic muscle progenitor cells during muscle homeostasis.

## 116 RESULTS

### 117 118 Extracellular matrix genes are enriched in the dermomyotome

119 The dermomyotome in zebrafish is traditionally labeled by expression of the muscle  
120 progenitor cell marker *pax7* (Devoto et al., 2006; Feng et al., 2006; Hammond et al., 2007).  
121 Using double fluorescent in situ hybridization, we identified several extracellular matrix (ECM)  
122 genes, including *col1a2* (*collagen 1a2*), *col5a1* (*collagen 5a1*) and *cilp* (*cartilage intermediate*  
123 *layer protein*), that showed co-expression with *pax7* in the dermomyotome on the outer  
124 surface of the somite (Fig. 1A). To visualize the dynamics of dermomyotome cells *in vivo*, we  
125 generated a *col1a2:Gal4* transgenic line by BAC (bacteria artificial chromosome)  
126 recombineering (Fig. 1B). The *col1a2:Gal4* line can be crossed with different UAS lines to  
127 label, ablate, or lineage trace dermomyotome cells. Co-labeling using *col1a2* and *kaede*  
128 probes in *col1a2:Gal4; UAS:Kaede* (*col1a2<sup>Kaede</sup>* in short) embryos revealed that the  
129 *col1a2:Gal4* reporter largely recapitulated the endogenous *col1a2* expression pattern (Fig.  
130 S1). Similarly, *col1a2:Gal4; UAS:NTR-mCherry* (*col1a2<sup>NTR-mCherry</sup>* in short) labeled the outer  
131 surface of the somite external to *α-actin:GFP*-expressing muscle cells, corresponding to the  
132 anatomical location of the dermomyotome (Fig. 1C and Movie 1). The labeling of a few  
133 muscle fibers by *col1a2<sup>NTR-mCherry</sup>* suggests that *col1a2<sup>+</sup>* cells contribute to muscle fiber  
134 formation. To confirm that the *col1a2:Gal4* line labels the dermomyotome, we performed  
135 immunostaining using the anti-Pax7 antibody in *col1a2<sup>NTR-mCherry</sup>* embryos at 2 dpf. Pax7  
136 antibody labels both dermomyotome cells (weaker staining) and xanthophores, neural crest-  
137 derived pigment cells (stronger staining). Indeed, all *mCherry<sup>+</sup>* cells on the lateral surface of  
138 the somite were weakly *Pax7<sup>+</sup>* (Fig. 1D), indicating that *col1a2<sup>NTR-mCherry</sup>* specifically labels the  
139 dermomyotome but not xanthophores. To determine whether the dermomyotome is present  
140 in adult zebrafish, we imaged vibratome sections of *col1a2<sup>NTR-mCherry</sup>* fish at 22 mm SL  
141 (standard length). We identified three layers of *col1a2<sup>+</sup>* cells external to the muscles,  
142 corresponding to scales (the most outer layer), skin (the middle layer), and the presumptive  
143 dermomyotome (the most inner layer external to muscles) (Fig. 1E). The presence of a few  
144 *mCherry<sup>+</sup>* muscle fibers adjacent to the presumptive dermomyotome suggests that  
145 dermomyotome cells contribute to muscle growth in adult zebrafish.

146

## 147 **Characterization of the dermomyotome**

148 Using the *col1a2:Gal4* line, we determined the number, distribution, morphology, and  
149 dynamics of dermomyotome cells. To quantify the number of dermomyotome cells, we first  
150 performed Pax7 antibody staining in *col1a2<sup>NTR-mCherry</sup>* embryos at 2 dpf. On average, there  
151 were 25 Pax7<sup>+</sup> dermomyotome cells per somite, of which about 87% were also *col1a2<sup>+</sup>* (Fig.  
152 2A), suggesting that the *col1a2<sup>NTR-mCherry</sup>* line labels most dermomyotome cells. The  
153 incomplete labeling likely reflects the variegated nature of the Gal4-UAS system (Akitake et  
154 al., 2011). Second, *col1a2<sup>+</sup>* dermomyotome cells appeared to distribute evenly to cover the  
155 entire surface of the somite (Fig. 1D). About 42% of cells were located along the vertical  
156 myoseptum, 43% in between somite boundaries, and 15% along the horizontal myoseptum  
157 (Fig. 2B,C). Third, by taking advantage of some highly mosaic *col1a2<sup>Kaede</sup>* embryos, we were  
158 able to visualize the morphology of individual dermomyotome cells at 3 dpf (Fig. 2D). They  
159 were relatively flat cells sandwiched between the epithelium and muscle fibers. Individual  
160 *col1a2<sup>+</sup>* dermomyotome cells appeared to either “float” in between the two somite boundaries  
161 or “anchor” their cell bodies along the myoseptum. They always exhibited a remarkable  
162 ramified morphology with multipolar lamellipodia-like cellular projections (Fig. 2D). Thin  
163 cellular projections (up to 10  $\mu\text{m}$ ) extending out of these lamellipodia can often be observed  
164 in *col1a2<sup>+</sup>* cells, suggesting potential long range cell-cell communications or the ability to  
165 detect distant injuries. By combining two UAS reporters, we visualized the dynamics of  
166 dermomyotome cells in *col1a2:Gal4; UAS:NTR-mCherry; UAS:Kaede* embryos (Fig. 2E). The  
167 mosaic nature of these transgenes allowed us to label a large number of dermomyotome  
168 cells in different colors. Dermomyotome cells appeared to evenly cover the surface of the  
169 somite with each cell occupying a non-overlapping territory. Time-lapse imaging showed that  
170 after cell division, daughter cells regained the ramified morphology and maintained the similar  
171 territory previously occupied by the mother cell (Fig. 2E and Movie 2). Together, our results  
172 demonstrate that the new *col1a2:Gal4* driver can be utilized to visualize the dynamics of  
173 dermomyotome cells at single cell resolution in zebrafish.

174

## 175 **Dermomyotome cells generate new muscle fibers during embryonic muscle growth**

176 To determine whether the dermomyotome contributes to muscle growth, we performed  
177 two different lineage tracing experiments to follow *col1a2<sup>+</sup>* dermomyotome cells. In the first

178 approach, we took advantage of the photoconvertible fluorescent protein, Kaede (Ando et al.,  
179 2002). The normally green-fluorescent Kaede protein (*Kaede<sup>green</sup>*) can be photoconverted to a  
180 red-fluorescent Kaede protein (*Kaede<sup>red</sup>*) by UV light. The perdurance of the *Kaede<sup>red</sup>* protein  
181 allows us to trace Kaede-expressing cells for multiple days during development. Briefly, we  
182 photoconverted a region of 5-6 somites in *col1a2<sup>Kaede</sup>* embryos at 3 dpf, labeling *col1a2<sup>+</sup>*  
183 dermomyotome cells with *Kaede<sup>red</sup>* (Fig. 3A). We then imaged the converted region of the  
184 same fish 24 and 48 hours later. New muscle fibers can be easily identified based on their  
185 elongated morphology spanning the entire somite between two adjacent vertical myosepta.  
186 The emergence of new *Kaede<sup>red</sup>* muscle fibers suggests that *col1a2<sup>+</sup>* dermomyotome cells  
187 contribute to new muscle fibers during normal larval development (Fig. 3B).

188 As a complementary approach, we performed Cre-mediated lineage tracing to determine  
189 the fate of *col1a2<sup>+</sup>* dermomyotome cells. We generated the *col1a2:Gal4; UAS:Cre-ERT2*  
190 (*col1a2<sup>Cre-ERT2</sup>* in short) transgenic line to express tamoxifen-inducible Cre recombinase in  
191 dermomyotome cells, and utilized the *ubi:loxP-EGFP-loxP-mCherry (ubi:Switch)* line  
192 (Mosimann et al., 2011) as the lineage reporter. Induction of Cre activity by 4-  
193 hydroxytamoxifen (4-OHT) results in the excision of the EGFP cassette and subsequent  
194 expression of the mCherry protein in the cell and its progeny (Fig. 3C). *col1a2<sup>Cre-ERT2</sup>*;  
195 *ubi:Switch* embryos were treated with 4-OHT for 2 hours at 3 dpf and imaged every 24 hours  
196 thereafter. At 24 hours after 4-OHT pulse, *col1a2<sup>+</sup>* dermomyotome cells were mosaicly  
197 labeled by the mCherry expression, but no muscle fibers were labeled (Fig. 3D). Tracing of  
198 *mCherry<sup>+</sup>* dermomyotome cells for 4 consecutive days revealed that new *mCherry<sup>+</sup>* muscle  
199 fibers started to emerge at 48 hours post 4-OHT pulse, and increased in number at later time  
200 points. Thus, consistent with Kaede-based lineage tracing experiments, this result confirms  
201 that dermomyotome cells contribute to the generation of new muscle fibers during muscle  
202 homeostasis.

203

## 204 **ECM dynamics during muscle regeneration**

205 We have shown above that *col1a2<sup>+</sup>* dermomyotome cells express muscle progenitor  
206 marker *pax7* and contribute to normal muscle growth. To determine whether they also  
207 contribute to muscle regeneration, we performed needle injury experiments on muscles of  
208 *col1a2<sup>NTR-mCherry</sup>;  $\alpha$ -actin:GFP* embryos (Fig. 4A). Fish were injured within a 1-2 somite area



209 at 3 dpf and imaged every 24 hours for 3 days. At 24 hpi (hours post injury), the injury area,  
210 as indicated by the absence of *α-actin:GFP* expression, became substantially smaller than  
211 that at 1 hpi. This was accompanied by the emergence of elongated *mCherry*<sup>+</sup> cells in the  
212 *GFP* area, suggesting that *col1a2*<sup>+</sup> dermomyotome cells were recruited to the injury site. By  
213 48 hpi, the injury area was completely replaced by newly regenerated muscles, as indicated  
214 by higher level of *α-actin:GFP* expression compared to uninjured regions. At 72 hpi, some  
215 newly formed muscles were also labeled by *mCherry* expression, suggesting that they were  
216 derived from *col1a2*<sup>+</sup> dermomyotome cells. Thus, needle injury experiments demonstrate that  
217 small muscle injuries can be quickly repaired within 48 hours in zebrafish and *col1a2*<sup>+</sup>  
218 dermomyotome cells are likely the source of new muscle fibers.

219 We further investigated the expression kinetics of different markers during the entire  
220 process of muscle injury repair. Fish were injured by needle stabbing at 3 dpf, and fixed at  
221 different time points (7, 24, 48, 76 hpi) for in situ analysis (Fig. 4B). The expression of the  
222 muscle stem cell marker *pax7* reached the highest level at the injury site at 24 hpi. The  
223 elevated *pax7* expression remained at 48 hpi before returning back to the basal level by 76  
224 hpi. By contrast, myogenic markers (*myoD* and *myogenin*) displayed a kinetics slightly  
225 lagging behind *pax7*. Their expression initiated at 24 hpi, reached the peak level at 48 hpi,  
226 and returned to the basal level by 76 hpi. This result is consistent with the timing of muscle  
227 regeneration from the activation of muscle progenitor cells to the differentiation of new  
228 muscle fibers (Fig. 4A). Lastly, analysis of several ECM genes (*col1a2*, *col5a1*, *col1a1a*, *cilp*,  
229 *postnb* and *sparc*) revealed similar expression kinetics as *pax7* (Figs 4B and S2). The  
230 expression of ECM genes was strongly induced at the injury site at 24 hpi and then gradually  
231 declined in the following 48 hours. Together, our results suggest that dermomyotome cells  
232 not only are recruited to the injury site to generate new muscle fibers, but also upregulate  
233 ECM gene expression perhaps to facilitate the repair.

234

### 235 **Single cell dynamics of dermomyotome cells**

236 We have shown that dermomyotome cells generate new muscle fibers during both normal  
237 muscle growth and muscle injury repair. To define the dynamic behavior of individual  
238 dermomyotome cells *in vivo*, we performed single cell clonal analysis by taking advantage of  
239 the photoconvertible Kaede and the mosaic nature of the *col1a2*<sup>Kaede</sup> transgenic line.

240 Photoconversion of one isolated *Kaede<sup>green</sup>* dermomyotome cell allowed us to visualize its  
241 cellular behavior and trace all of its *Kaede<sup>red</sup>* descendants. Briefly, we screened *col1a2<sup>Kaede</sup>*  
242 fish at 3 dpf and identified embryos with mosaic labeling of the dermomyotome. Single  
243 isolated *Kaede<sup>green</sup>* cells were photoconverted with one cell per somite (3-4 cells per embryo)  
244 to ensure accurate cell tracing across multiple time points. We then used the two-photon  
245 laser to introduce targeted muscle injury near one *Kaede<sup>red</sup>* cell. *Kaede<sup>red</sup>* dermomyotome  
246 cells in laser ablated somites were referred to as cells under injured condition, whereas  
247 photoconverted cells in uninjured somites were defined as control cells under wild-type  
248 condition. Individual embryos were imaged at 1, 24, 48, and 72 hpi to capture the dynamics  
249 of individual converted cells and their descendants (Fig. 5A).

250 Based on cell behaviors of each clone, we categorized the response of dermomyotome  
251 cells into four different categories (Fig. 5B). In type I response, cells did not proliferate and  
252 maintained the ramified morphology throughout 72 hours. In type II response, cells  
253 underwent one or more cell divisions, but all daughters maintained the ramified morphology,  
254 suggesting a quiescent state. By contrast, in type III response, cells generated small  
255 elongated cells, which were usually bi-polar with processes extending along muscle fibers.  
256 This is markedly distinct from the multipolar ramified morphology of quiescent  
257 dermomyotome cells, suggesting an activated state. Lastly, in type IV response, cells first  
258 gave rise to small elongated cells similar to those in the type III response, some of which later  
259 generated one or more *Kaede<sup>red</sup>* muscle fibers by 72 hpi. As Kaede protein appeared to  
260 concentrate in the nuclei of muscle cells (Fig. S3A), new muscle fibers generated from  
261 *Kaede<sup>red</sup>* cells can be easily identified based on the stronger *Kaede<sup>red</sup>* signal in the oval-  
262 shaped nucleus with a weaker and diffusive signal in the cytoplasm spanning the width of a  
263 somite. Antibody staining confirmed that the *Kaede<sup>red</sup>* nucleus of a newly generated muscle  
264 no longer expressed Pax7, a feature typical of differentiated muscles, whereas small  
265 elongated cells remained *Pax7<sup>+</sup>* (Fig. S3B). Together, under wild-type conditions,  
266 dermomyotome cells generated predominantly type I (59%, 38/65 cells) or type II (40%,  
267 26/65 cells) responses, but rarely type III response (2%, 1/65 cells) and never type IV  
268 response (Fig. 5C). By contrast, cells under injured conditions exhibited all four types of  
269 responses, with a combined 35% (24/68 cells) in the type III and IV categories. Similarly, 24%  
270 (16/68 cells) of dermomyotome cells in injured condition generated clones of at least 3 cells

271 compared to only 2% (1/65 cells) in wild-type conditions (Fig. S3C), suggesting an increase in  
272 cell proliferation during muscle injury repair. These results suggest that type III/IV behaviors  
273 represent the muscle regenerative response of “activated” dermomyotome cells. Since the  
274 formation of new muscle fibers was always preceded by small elongated cells (Fig. 5B), the  
275 type III response likely represents a transitional phase before the formation of new muscle  
276 fibers (type IV response).

277 Since not all dermomyotome cells would respond to the injury in the same somite (Fig.  
278 5B,C), we asked whether the initial position of the cell influences its behavior. We found that  
279 the distance from the injury to the center of the labeled cells does not correlate with the type  
280 of response (Fig. 5D). For example, some cells at 24  $\mu\text{m}$  away failed to respond to the injury,  
281 while some other cells over 80  $\mu\text{m}$  away became activated. This result suggests that  
282 dermomyotome cells can detect and respond to an injury at a long distance away from the  
283 cell body. Interestingly, dermomyotome cells located along the myoseptum are more likely to  
284 generate a type III or IV response (52%, 12/23 cells) than centrally located cells (29%, 13/45  
285 cells) (Fig. 5E), suggesting that the local niche might influence the behavior of muscle  
286 progenitor cells.

287

### 288 **New muscle fibers are predominantly generated by fusion**

289 Our single cell lineage tracing experiments indicate that “activated” dermomyotome cells  
290 go through a series of stereotypic phases to generate new muscle fibers (Fig. 5). To further  
291 confirm this, we carried out confocal time-lapse imaging to visualize the entire process of  
292 muscle regeneration. First, we imaged the “early phase” of muscle repair between 0 to 24 hpi  
293 (Fig. 6A). Moderately mosaic *col1a2*<sup>Kaede</sup> embryos were injured by needle stabbing at 59 hpf.  
294 Isolated *Kaede*<sup>green</sup> cells were photoconverted to facilitate cell tracking (Fig. 6B and Movie 3).  
295 Within the first 24 hours, the “activated” dermomyotome cell started to project polarized  
296 cellular processes along muscle fibers. This bi-polar and elongated morphology was  
297 maintained even after the cell division. Consistent with our previous observations, new  
298 muscle fibers were rarely generated during this time interval. Thus, the “early phase” of  
299 muscle regeneration is characterized by the morphological changes and proliferations of  
300 “activated” dermomyotome cells. Next, we performed time-lapse imaging of the “late phase”  
301 of muscle injury repair. Mosaic *col1a2*<sup>Kaede</sup> embryos were injured by needle stabbing at 3 dpf

302 and imaged from 29 to 48 hpi (Fig. 6C). From a total of 9 movies collected, we observed the  
303 generation of 13 new muscle fibers. Remarkably, all 13 fibers were formed in a similar  
304 fashion: a small elongated *Kaede*<sup>+</sup> cell at one time point disappeared by the next time point  
305 (8-minute intervals), with simultaneous emergence of *Kaede*<sup>+</sup> muscle fiber characterized by  
306 *Kaede*<sup>strong</sup> nucleus and *Kaede*<sup>weak</sup> cytoplasm (Fig. 6D). The rapidity of this event suggests  
307 that new muscle fibers are formed through cell fusions between a *Kaede*<sup>+</sup> dermomyotome  
308 derived cell and an existing non-labeled muscle fiber.

309 Since we never observed any *de novo* fiber formation in our time-lapse movies, we asked  
310 whether muscles are formed only through cell fusions. To answer this question, we  
311 performed genetic lineage tracing in the *col1a2*<sup>Cre-ERT2</sup>; *ubi:Switch* fish (Fig. 7A). Embryos at 3  
312 dpf were treated with 4-OHT for 3.5 hours to mosaically label dermomyotome cells. Fish were  
313 then injured by needle stabbing and imaged at 75 hpi to quantify newly formed *mCherry*<sup>+</sup>  
314 muscle fibers. If a new muscle fiber is generated *de novo*, it would be *mCherry*<sup>+</sup> but *EGFP*<sup>-</sup>  
315 due to the excision of the EGFP cassette by Cre-mediated switching. Conversely, if an  
316 *mCherry*<sup>+</sup> dermomyotome cell fuses with an already existing muscle fiber (*EGFP*<sup>+</sup>), the  
317 resulting new muscle fiber will express both mCherry and EGFP (Fig. 7B). In uninjured  
318 control embryos, 97% of new muscle fibers (37/38) were formed via cell fusion, whereas only  
319 3% of fibers (1/38) were generated *de novo* (Fig. 7C,D). Interestingly, in injured embryos, *de*  
320 *nov*o fiber formation increased slightly to 14% (14/98) at the muscle injury site. Together, this  
321 result is consistent with our time-lapse imaging that new muscle fibers are generated  
322 predominantly through cell fusion of dermomyotome descendants with existing muscle fibers.  
323

### 324 **Dermomyotome cells are required for effective muscle regeneration**

325 To test whether dermomyotome cells are essential for embryonic muscle injury repair, we  
326 ablated *col1a2*<sup>+</sup> dermomyotome cells using the nitroreductase (NTR) based system. The  
327 NTR enzyme converts the harmless prodrug metronidazole (MTZ) into a cytotoxic compound  
328 that induces rapid cell death of NTR-expressing cells (Curado et al., 2008; Pisharath et al.,  
329 2007). *col1a2*<sup>NTR-mCherry</sup> or sibling control embryos were treated with MTZ from 2 to 3 dpf,  
330 injured at 3 dpf, and fixed at 24 hpi for in situ analysis (Fig. 7E). In control embryos, *myoD*  
331 expression was significantly upregulated at the site of injury (Fig. 7F), suggesting a robust  
332 regenerative response. By contrast, most MTZ-treated *col1a2*<sup>NTR-mCherry</sup> embryos showed no

333 specific induction of *myoD* at the injury site. This result suggests that *col1a2<sup>+</sup>* dermomyotome  
334 cells are required for an efficient muscle injury repair in early zebrafish embryos.

## 335 **DISCUSSION**

336

337 Using zebrafish as a model, our study provides a dynamic view of embryonic muscle  
338 progenitor cells in the dermomyotome. First, dermomyotome cells display a unique ramified  
339 morphology expressing many ECM genes. Second, lineage tracing experiments show that  
340 dermomyotome cells contribute to normal muscle growth as well as muscle injury repair.  
341 Third, dermomyotome cells undergo a series of stereotypical steps to generate new muscle  
342 fibers, predominantly by cell fusion with existing fibers.

343

### 344 **Dermomyotome cells are embryonic muscle progenitor cells**

345 Dermomyotome is an evolutionarily conserved structure on the external surface of the  
346 myotome present in most vertebrates (Devoto et al., 2006). In zebrafish, the dermomyotome  
347 displays remarkable similarities to that of higher vertebrates. Our work and that of others  
348 (Devoto et al., 2006; Feng et al., 2006; Hammond et al., 2007) show that the dermomyotome  
349 occupies a similar domain on the surface of each somite and expresses the muscle  
350 progenitor cell marker *pax7*. Previous work in mouse and chick has shown that satellite cells  
351 originate from the embryonic dermomyotome (Gros et al., 2005; Kassam-Duchossoy et al.,  
352 2005; Relaix et al., 2005; Schienda et al., 2006). Consistent with this, using lineage tracing  
353 and time-lapse imaging, we showed that *col1a2<sup>+</sup>* dermomyotome cells contribute to not only  
354 new muscle fibers but also small *pax7<sup>+</sup>* fiber-associated cells, likely corresponding to larval  
355 muscle progenitor cells (Gurevich et al., 2016; Nguyen et al., 2017; Pipalia et al., 2016; Roy  
356 et al., 2017; Seger et al., 2011).

357 We also observed some differences between zebrafish and higher vertebrates. First, in  
358 mouse and chick, the dermomyotome has been shown to give rise to both muscles and the  
359 dermis (Christ and Scaal, 2008; Stellabotte and Devoto, 2007). Interestingly, we did not  
360 observe any contribution of *col1a2<sup>+</sup>* dermomyotome cells to the dermis in cell tracing  
361 experiments. One possible explanation is that *col1a2<sup>+</sup>* dermomyotome cells are already  
362 committed to the myogenic lineage by the time our *col1a2* reporters are expressed at high  
363 level in the dermomyotome at 2 dpf. Indeed, dye labeling of early dermomyotome precursors  
364 in the anterior somitic compartment prior to the somite rotation marks both muscles and some  
365 dermal-like cells (Hollway et al., 2007). Second, we found that the zebrafish dermomyotome

366 persists in adults, similar to previous observations of *pax7* and *pax3* expression on the lateral  
367 surface of adult myotomes (Hollway et al., 2007; Nguyen et al., 2017). This persistence is in  
368 contrast with the amniotic dermomyotome, which is shown to be a transient embryonic  
369 structure (Christ and Scaal, 2008; Stellabotte and Devoto, 2007). The presence of the  
370 dermomyotome in adult zebrafish is likely required for the continuous growth of the fish.

371

### 372 **Unique morphology of dermomyotome cells**

373 Using *col1a2* transgenic lines, we identified several new features of dermomyotome cells.  
374 First, dermomyotome cells display a ramified morphology. In a quiescent state, these cells  
375 are not polarized, with lamellipodia-like structures all around the cell. This morphology is in  
376 contrast with mouse satellite cells, which usually display a bipolar morphology with short  
377 processes extending along the myofiber (Webster et al., 2016). Second, although  
378 dermomyotome cell bodies are mostly stationary in uninjured conditions, their cellular  
379 processes are quite dynamic, constantly extending and retracting. Each cell and its  
380 processes occupy a largely non-overlapping area, reminiscent of the tiling of neuronal  
381 dendrites (Grueber and Sagasti, 2010). During cell division, the mother cell retracts all its  
382 processes, but immediately after the division, the two daughter cells would extend new  
383 processes to reclaim the similar surface area. These dynamic behaviors might ensure the  
384 complete coverage of the somitic surface and detect potential muscle injuries. Lastly, we  
385 often observed long filopodia-like structures extending from dermomyotome cells. Intriguingly,  
386 our single cell lineage analysis revealed that the distance between the dermomyotome cell  
387 body and the injury site is not a reliable predictor of whether the cell would generate a  
388 regenerative response. It thus raises the possibility that the long cellular projections might  
389 allow the dermomyotome cell to detect muscle injury at a significant distance away from the  
390 cell body. Consistent with our findings, dermomyotome cells in chick display similar filopodia-  
391 like protrusions, facilitating the interaction with the overlying ectoderm during somite  
392 development (Sagar et al., 2015).

393

### 394 **ECM genes as novel markers of dermomyotome cells**

395 The dermomyotome is traditionally defined by muscle progenitor cell markers *pax7* and  
396 *pax3*. We demonstrated that the zebrafish dermomyotome expresses a number of ECM

397 genes, including *col1a2*, *col5a1*, and *cilp*. Consistent with our finding, an ultrastructural  
398 expression analysis in zebrafish identifies some *col1a2*<sup>+</sup> mesenchymal cells on the surface of  
399 muscles, likely corresponding to dermomyotome cells (Le Guellec et al., 2004). Similarly,  
400 *col1a1* and *cilp* have been shown to express in a dermomyotome-like domain in trout  
401 embryos (Ralliere et al., 2015; Rescan et al., 2005). Moreover, we found that the expression  
402 of these ECM genes is dynamically induced during muscle injury repair. Our observations in  
403 embryonic muscle progenitor cells in zebrafish show strong similarities to mouse muscle  
404 progenitor cells. For example, fetal muscle stem cells in mice show high-level expression of  
405 several ECM molecules, such as tenascin-C (*TnC*), fibronectin (*Fn1*), and collagen VI (*Col6*)  
406 (Tierney et al., 2016). Similarly, newly identified *Twist2*<sup>+</sup> mouse muscle progenitor cells show  
407 enrichment in many ECM genes, including *Col1a1*, *Col1a2*, and *Cilp* (Liu et al., 2017).  
408 Interestingly, although quiescent adult satellite cells do not express high level of ECM genes  
409 (Liu et al., 2017), activated satellite cells show upregulation of many collagen genes, such as  
410 *Col1a1* and *Col1a2* (Pallafacchina et al., 2010). Thus, dynamic regulation of ECM gene  
411 expression might be a common feature of muscle progenitor cells.

412 Does the ECM play an active role in regulating the function of dermomyotome cells? We  
413 envision two non-mutually exclusive scenarios. First, the ECM might be an integral part of the  
414 niche in maintaining the self-renewing property of muscle progenitors. Recent work has  
415 implicated many ECM components, including fibronectin, tenascin-C, laminins, and  
416 collagens, as critical niche factors that modulate satellite cell function (Bentzinger et al.,  
417 2013b; Fry et al., 2017; Rayagiri et al., 2018; Tierney et al., 2016; Urciuolo et al., 2013). In  
418 particular, it has been shown that Collagen V produced by adult muscle satellite cells is an  
419 essential component of the quiescent niche, as deletion of the *Col5a1* gene results in  
420 depletion of the stem cell pool (Baghdadi et al., 2018). Second, the induction of ECM gene  
421 expression upon muscle injury might provide the appropriate scaffold for the recruitment  
422 and/or migration of activated muscle progenitor cells. Consistent with this idea, intravital  
423 imaging of muscle regeneration in mice reveals that ECM remnants from injured muscle  
424 fibers provides cues to regulate muscle progenitor cell behavior (Webster et al., 2016). It  
425 remains to be investigated whether loss of any ECM component would compromise the  
426 regenerative capacity of dermomyotome cells in zebrafish.

427



## 428 **Single cell dynamics of dermomyotome cells during injury repair**

429 The existing *pax7* reporters in zebrafish label not only the dermomyotome and the  
430 overlying xanthophores, but also fiber-associated deep myotomal cells (Pipalia et al., 2016;  
431 Seger et al., 2011), which makes imaging individual dermomyotome cells challenging. To  
432 circumvent this issue, we developed a new *col1a2:Gal4* transgenic line to label and image  
433 dermomyotome cells. By taking advantage of the variegated nature of the *col1a2:Gal4*;  
434 *UAS:Kaede* line and the photoconvertible Kaede, we performed single cell clonal analysis of  
435 dermomyotome cells. A “quiescent” dermomyotome cell (type I/II responses) maintains its  
436 ramified morphology even after occasional cell divisions. By contrast, an “activated”  
437 dermomyotome cell (type III/IV responses) undergoes several stereotypic steps to generate  
438 new muscle fibers (Fig. 7G). First, it changes from its resting ramified morphology to an  
439 elongated and polarized morphology, usually within the first 3-5 hours after injury. The cell  
440 extends long cellular projections along the longitudinal axis of neighboring muscle fibers.  
441 Next, the “activated” cell undergoes several rounds of cell divisions generating a clone of  
442 small polarized daughter cells by 12-24 hpi. Finally, by 72 hpi, new muscle fibers emerge at  
443 the injury site, likely formed through fusion with uninjured muscle fibers (discussed below).  
444 The dynamic behaviors of an “activated” dermomyotome cell, such as the initial polarization  
445 phase, are reminiscent of *myf5*<sup>+</sup> fiber-associated muscle progenitor cells during muscle  
446 regeneration (Gurevich et al., 2016). Interestingly, unlike *myf5*<sup>+</sup> muscle progenitor cells,  
447 dermomyotome cells do not cross the myotendinous junction to repair muscle injury in  
448 neighboring somites. Quantification of our single cell clonal analysis further reveals that  
449 although the distance to the injury does not predict the response of the dermomyotome cell  
450 (discussed above), dermomyotome cells located along myosepta are more likely to respond  
451 to the injury than centrally located ones. This result suggests that ECM-enriched  
452 myotendinous junction might provide the scaffold to facilitate the migration of activated  
453 dermomyotome cells.

454

## 455 **Dermomyotome cells generate new fibers by fusion**

456 Two independent lines of evidence indicate that dermomyotome cells generate new  
457 muscle fibers primarily through cell fusion. First, time-lapse imaging of the regeneration  
458 process in *col1a2*<sup>Kaede</sup> embryos showed that the emergence of *Kaede*<sup>+</sup> muscle fiber always

459 appeared to be completed between two time points (8-minute interval), accompanied by the  
460 simultaneous disappearance of the dermomyotome cell. The absence of intermediate steps,  
461 such as searching for attachment sites along the myotendinous junction, suggests that new  
462 fibers are formed by cell fusion rather than *de novo* fiber formation. Second, our Cre-  
463 mediated lineage tracing experiments showed that most new muscle fibers express both  
464 EGFP and mCherry, indicating cell fusion events between a switched dermomyotome cell  
465 (*mCherry<sup>+</sup>, ubi:loxP-mCherry*) and an un-switched muscle fiber (*EGFP<sup>+</sup>, ubi:loxP-EGFP-loxP-*  
466 *mCherry*). Intriguingly, during muscle injury repair, significantly more *de novo* fiber formation  
467 (14%) was observed compared to uninjured conditions (3%). This discrepancy might be  
468 explained by differential activation of sub-populations of dermomyotome cells. Recent work  
469 shows that two paralogues of *pax7*, *pax7a* and *pax7b*, mark similar but not identical muscle  
470 progenitor cell populations. *pax7b<sup>+</sup>* cells contribute to muscle growth and repair by cell  
471 fusions, whereas *pax7a<sup>+</sup>pax7b<sup>-</sup>* cells predominantly generate nascent fibers (Pipalia et al.,  
472 2016). Our results suggest that normal muscle growth is primarily contributed by *pax7b<sup>+</sup>*  
473 dermomyotome cells, while muscle injury activates both *pax7b<sup>+</sup>* and *pax7a<sup>+</sup>pax7b<sup>-</sup>* cells.  
474 Consistent with this idea, *pax7a<sup>+</sup>* cells have been shown to contribute to only large muscle  
475 injuries but not small injuries (Knappe et al., 2015).

476  
477 In summary, our work provides a dynamic view of dermomyotome cells during muscle  
478 growth and repair. It also raises additional questions for future investigations. For example,  
479 what is the injury signal that activates dermomyotome cells? Tissue injury is often associated  
480 with elevated level of reactive oxygen species (ROS) and the recruitment of patrolling  
481 immune cells such as macrophages and neutrophils (Love et al., 2013; Niethammer et al.,  
482 2009). It is therefore plausible that ROS and/or cytokines secreted by immune cells might be  
483 the trigger to activate dermomyotome cells. Indeed, mice and human data have implicated  
484 macrophages and other immune cells as the critical regulators of satellite cell functions  
485 (Bentzinger et al., 2013a; Saclier et al., 2013).

## 486 **MATERIALS AND METHODS**

487

### 488 **Zebrafish strains**

489 Zebrafish strains were maintained and raised according to the standard protocols  
490 (Westerfield, 2000). All procedures were approved by the University of Calgary Animal Care  
491 Committee. Embryos were grown at 28.5 °C and staged as previously described (Kimmel et  
492 al., 1995). Fish older than 24 hpf were treated with 1-phenyl 2-thiourea (PTU) to prevent  
493 pigmentation. TL and TL/AB wild-type strains were used in this study along with the following  
494 transgenic lines: *α-actin:GFP* (Higashijima et al., 1997), *col1a2:Gal4*, *UAS:Kaede* (Scott et  
495 al., 2007), *UAS:NTR-mCherry* (Davison et al., 2007), *UAS:Cre-ERT2*, *Ubi:loxP-EGFP-loxP-*  
496 *mCherry (Ubi:Switch)* (Mosimann et al., 2011). The mosaic *col1a2:Gal4; UAS:Kaede* line was  
497 maintained by selectively growing embryos with more mosaic Kaede expression.

498

### 499 **Generation of transgenic lines**

500 *UAS:Cre-ERT2* was generated by standard Tol2-mediated transgenesis. To generate  
501 *col1a2:Gal4* transgenic line, BAC clone zC122K13 from the CHORI-211 library that contains  
502 *col1a2* genomic region with 78 kb upstream and 58 kb downstream regulatory sequences  
503 was selected for bacteria mediated homologous recombination following the standard  
504 protocol (Bussmann and Schulte-Merker, 2011). Briefly, the pRedET plasmid was first  
505 transformed into BAC-containing bacteria. Second, an iTol2\_amp cassette containing two  
506 Tol2 arms in opposite directions flanking an ampicillin resistance gene was recombined into  
507 the vector backbone of zC122K13. Lastly, a cassette containing the Gal4-VP16 with a  
508 kanamycin resistant gene was recombined into zC122K13-iTol2\_amp to replace the first  
509 coding exon of the *col1a2* gene. After each round of recombination, successful recombinants  
510 were confirmed by PCR analysis. The final *col1a2:Gal4* BAC was then co-injected with *tol2*  
511 transposase mRNA into *UAS:Kaede* embryos at one-cell stage. Positive transgenic lines  
512 were identified by screening Kaede expression in F1 embryos from injected founders.

513

### 514 **Muscle injury**

515 Two methods were employed to generate muscle injury at specific locations in larval  
516 zebrafish. In needle injury, we used a sharp injection needle to stab muscles near the end of

517 yolk extension (somites 17-19) so the injury site can be recognized easily during the lineage  
518 tracing. Alternatively, to introduce muscle injury at a more precise location, laser ablation was  
519 performed with the 750 nm laser and the 25x objective on the Leica TCS SP8 multi-photon  
520 microscope. A region of interest (ROI) at a desired location was selected, zoomed in to the  
521 maximum (48x), and scanned with 100% 750 nm laser once. The laser-induced injury can be  
522 readily visualized in the bright field after the scanning.

523

## 524 **Kaede photoconversion**

525 *col1a2*<sup>Kaede</sup> embryos at appropriate stages were anesthetized with tricaine and mounted in  
526 0.8% low melting point agarose in a glass bottom dish (MatTek). Photoconversion  
527 experiments were performed using the 405 nm laser and the 20x objective on the Olympus  
528 FV1200 confocal microscope. For photoconversions of large areas (~ 5 to 6 somite region),  
529 50% laser power was used to scan the desired ROI for 2 frames at a dwell time of 200  $\mu$ s per  
530 pixel. For single cell photoconversions, 2% laser power was used to scan a small ROI (10 x  
531 10 pixels) with the Tornado mode at a dwell time of 2  $\mu$ s per pixel for a total of 1-2 seconds.  
532 After photoconversion, embryos were released from the agarose, transferred to fish water to  
533 recover in the dark, and analyzed at desired stages.

534

## 535 **Cre-mediated lineage tracing**

536 To obtain mosaic labeling, *col1a2:Gal4; UAS:Cre-ERT2; ubi:Switch* embryos were pulsed  
537 with 10  $\mu$ M 4-hydroxytamoxifen (4-OHT) for 2-3 hours at desired stages. After treatment, 4-  
538 OHT was washed off with fish water for three times, and embryos were recovered in fish  
539 water for analysis at appropriate stages.

540

## 541 **Single cell lineage tracing**

542 Mosaic *col1a2*<sup>Kaede</sup> embryos at appropriate stages were selected for single cell tracing  
543 experiments. Individual isolated cells were photoconverted to *Kaede*<sup>red</sup>. To ensure reliable  
544 cell tracing over time, a maximum of one cell per somite and four cells per embryo were  
545 photoconverted and traced. Immediately after photoconversion, muscle injury was introduced  
546 by laser ablation near one *Kaede*<sup>red</sup> cell. Images were taken before and after the  
547 photoconversion and then every 24 hours till 72 hpi to trace individual *Kaede*<sup>red</sup> cells. For

548 quantification in Fig. 7D, distance was measured from the center of the photoconverted cell to  
549 the center of the muscle injury.

550

### 551 **In situ hybridization and immunohistochemistry**

552 Whole-mount in situ hybridization and antibody staining were performed according to the  
553 standard protocols (Thisse et al., 2004). The following antisense probes were used in this  
554 study: *cilp*, *col1a1a*, *col1a2*, *col5a1*, *kaede*, *myoD*, *myogenin*, *pax7* (Seo et al., 1998), *postnb*  
555 and *sparc*. For antibody staining, the following primary antibodies were used: rabbit  
556 polyclonal antibody to Kaede (1:1000, MBL) and mouse monoclonal antibody to Pax7 (1:10,  
557 Developmental Studies Hybridoma Bank (DSHB)). For fluorescent detection of antibody  
558 labeling, appropriate Alexa Fluor-conjugated secondary antibodies (1:500, Molecular Probes)  
559 were used.

560

### 561 **Cell ablation experiments**

562 To ablate *col1a2*<sup>+</sup> cells, *col1a2*<sup>NTR-mCherry</sup> transgenic fish were outcrossed with wild-type  
563 fish to obtain *mCherry*<sup>+</sup> embryos (experimental group) and *mCherry*<sup>-</sup> embryos (control group).  
564 Embryos at 48 hpf were treated with metronidazole (MTZ) at a final concentration of 5 mM in  
565 fish water for 24 hours. Embryos were then washed with E3 fish water 2-3 times and grown to  
566 desired stages for analysis.

567

### 568 **Time-lapse imaging and processing**

569 Embryos were anesthetized with tricaine and embedded in 0.8% low melting point  
570 agarose on a glass bottom dish (MatTek). Fish were imaged with Olympus FV1200 confocal  
571 microscope using the 20x objective. For time-lapse imaging of muscle injury repair, embryos  
572 were first injured at 3 dpf either by needle stabbing or laser ablation. Injured embryos were  
573 then imaged laterally starting at either 0 or 29 hpi at 8-min intervals for 19-20 hours. All the  
574 confocal images were analyzed and quantified using the Fiji software (Schindelin et al.,  
575 2012). Brightness and contrast were adjusted for better visualization. To generate color-  
576 coded depth projections, confocal z-stacks were processed with Fiji using the 'temporal color  
577 code' function.

578

579 **Quantification of dermomyotome cells**

580 *col1a2*<sup>NTR-mCherry</sup> fish were stained with anti-Pax7 antibody at 2 dpf. Cells in each somite  
581 were counted based on *col1a2* expression and Pax7 staining: all Pax7<sup>+</sup> cells, Pax7<sup>+</sup>Col1a2<sup>+</sup>  
582 cells and Pax7<sup>+</sup>Col1a2<sup>-</sup> cells. Note that xanthophores, which have strong Pax7 staining, were  
583 not counted. Overall, average number of cells in five somites per embryo was used for the  
584 quantification. Pax7<sup>+</sup>Col1a2<sup>+</sup> cells were further categorized according to their position in a  
585 somite: near the vertical myosepta (VM), near the horizontal myoseptum (HM), or in between  
586 somatic boundaries (central).

587

588 **Data analysis**

589 All the graphs were generated in the GraphPad Prism software. For quantifications,  
590 standard error of the mean was calculated. To analyze significance between two samples, P  
591 values were determined by performing the Mann-Whitney *U* test.

592 **ACKNOWLEDGEMENTS**

593 We thank the zebrafish community for providing probes and reagents; Holger Knaut for  
594 BAC clones; Jason Berman for *UAS:NTR-mCherry* fish; Sarah Childs and members of the  
595 Huang laboratory for discussion; and Paul Mains and James McGhee for critical comments  
596 on the manuscript.

597

598 **COMPETING INTERESTS**

599 The authors declare that no competing interests exist.

600

601 **FUNDING**

602 This study was supported by grants to P.H. from the Canadian Institute of Health  
603 Research (MOP-136926), Canada Foundation for Innovation John R. Evans Leaders Fund  
604 (Project 32920), and Startup Fund from the Alberta Children's Hospital Foundation. P.S. was  
605 supported by the Eyes High Postdoctoral Fellowship. T.D.R. was supported by the Queen  
606 Elizabeth Scholarship.

607 **FIGURE LEGENDS**

608

609 **Figure 1. The dermomyotome is marked by the expression of ECM genes.** (A) Double  
610 fluorescent in situ hybridization showed the co-expression of ECM genes *col1a2*, *col5a1*, and  
611 *cilp* (red) with the muscle progenitor cell marker *pax7* (green) in the dermomyotome (arrows)  
612 at 3 dpf. Both lateral and transverse views are shown. Note that high-level *col1a2* expression  
613 in skin cells bleeds into the red channel (arrowheads). (B) Schematics of the *col1a2:Gal4*  
614 BAC reporter. (C) *col1a2<sup>NTR-mCherry</sup>;  $\alpha$ -actin:GFP* fish at 3 dpf showed mCherry expression  
615 (red) in the dermomyotome (short arrows) on the surface of muscles, labeled by  *$\alpha$ -actin:GFP*  
616 (green), cells around the notochord (arrowheads), and occasionally muscle fibers (long  
617 arrows). (D) *col1a2<sup>NTR-mCherry</sup>* fish were stained with the anti-Pax7 antibody at 2 dpf. Most  
618 *mCherry<sup>+</sup>* dermomyotome cells (red, arrows in expanded views) are co-labeled with Pax7  
619 (weaker staining). Note that Pax7 also labels *mCherry<sup>-</sup>* xanthophores (bean-shaped nuclei  
620 with stronger Pax7 staining, arrowheads). (E) Transverse views of *col1a2<sup>NTR-mCherry</sup>* fish at 22  
621 mm SL. Expanded views of the boxed region are shown on the right. mCherry expression  
622 (red) can be observed in the presumptive dermomyotome (short arrows), the skin (long  
623 arrows), scales (arrowheads), and occasionally muscles (asterisks). The autofluorescence  
624 signal (green) is shown to highlight the outline of muscle fibers. Scale bars: 50  $\mu$ m, except  
625 200  $\mu$ m in the full view of (E).

626

627 **Figure 2. Characterization of *col1a2<sup>+</sup>* dermomyotome.** (A) Quantification of  
628 dermomyotome cells per somite in *col1a2<sup>NTR-mCherry</sup>* fish stained with anti-Pax7 antibody at 2  
629 dpf. (B) Schematics of dermomyotome cell distribution. (C) Distribution of Pax7<sup>+</sup>Col1a2<sup>+</sup>  
630 dermomyotome cells based on their locations. (D) Mosaic *col1a2<sup>Kaede</sup>* embryos were selected  
631 to image single dermomyotome cells. Examples of dermomyotome cells in between vertical  
632 myosepta (VM) and along the VM are shown. Dermomyotome cells display ramified  
633 morphology with lamellipodia-like structures (arrows) and fine cellular protrusions  
634 (arrowheads in expanded views). (E) *col1a2:Gal4; UAS:NTR-mCherry; UAS:Kaede* embryos  
635 were imaged at 2 dpf for 7.9 hours. Snapshots from Movie 1 show the division of a  
636 dermomyotome cell (arrows). Scale bars: 50  $\mu$ m, except 20  $\mu$ m in expanded views in (D).

637



638 **Figure 3. *col1a2*<sup>+</sup> dermomyotome cells contribute to normal muscle growth.** (A)  
639 Schematics of photoconversion-based lineage tracing. (B) *col1a2*<sup>Kaede</sup> embryos were  
640 photoconverted at 3 dpf, and imaged at indicated time points. Color coded depth projections  
641 (green corresponds to superficial slices, while red denotes deep slices) of converted *Kaede*<sup>red</sup>  
642 showed that new *Kaede*<sup>red</sup> muscle fibers (arrow) emerged at 48-hour post conversion. An  
643 existing muscle fiber through all 3 time points is indicated by arrowheads. (C) Schematics of  
644 Cre-mediated lineage tracing experiments. (D) *col1a2*<sup>Cre-ERT2</sup>; *ubi:Switch* embryos were  
645 pulsed with 4-OHT for 2 hours at 3 dpf to induce EGFP excision, and imaged for 4 days.  
646 Color coded depth projections of the mCherry expression are shown. “Switched” *mCherry*<sup>+</sup>  
647 dermomyotome cells (arrowheads) at the “+24 hr” time point generated new *mCherry*<sup>+</sup>  
648 muscle fibers (arrows) starting from the “+48 hr” time point. Scale bars: 50  $\mu$ m.

649  
650 **Figure 4. ECM dynamics during muscle injury repair.** (A) *col1a2*<sup>NTR-mCherry</sup>;  *$\alpha$ -actin:GFP*  
651 embryos were needle injured at 3 dpf, and imaged at 1, 24, 48, and 72 hpi. Injured muscles  
652 (asterisks) can be identified by the lack of  *$\alpha$ -actin:GFP* expression (green), while regenerated  
653 muscles were marked by elevated  *$\alpha$ -actin:GFP* expression. *mCherry*<sup>+</sup> dermomyotome cells  
654 (arrows) emerged at the site of injury at 24 hpi, and generated new *mCherry*<sup>+</sup> muscle fibers  
655 by 72 hpi. (B) Wild-type embryos were needle stabbed to injure muscles near the end of yolk  
656 extension (asterisks) at 3 dpf, fixed at different time points, and stained with the stem cell  
657 marker (*pax7*), muscle markers (*myoD* and *myogenin*), and ECM markers (*col1a2* and  
658 *col5a1*). All markers showed upregulation at the site of injury starting from 24 hpi (arrows).  
659 Scale bars: 50  $\mu$ m.

660  
661 **Figure 5. Single cell clonal analysis of dermomyotome cells.** (A) Schematics of single  
662 cell lineage tracing experiments. Isolated *Kaede*<sup>green</sup> dermomyotome cells in *col1a2*<sup>Kaede</sup> fish  
663 at 3 dpf were photoconverted to *Kaede*<sup>red</sup>. Immediately after the photoconversion, muscles  
664 near the converted *Kaede*<sup>red</sup> cell were damaged by laser ablation (asterisk). The lineage of  
665 the *Kaede*<sup>red</sup> cell was inferred by imaging the same region every 24 hours. (B) Single cell  
666 lineage tracing in *col1a2*<sup>Kaede</sup> embryos. Four types of responses are represented in cartoons  
667 on top with corresponding examples shown at the bottom. Each embryo was imaged at 3 dpf  
668 immediately after the photoconversion but before the injury and then at 1, 24, 48, 72 hpi.

669 Note that laser ablation often resulted in elevated autofluorescence at the center of the injury  
670 (asterisks). Individual dermomyotome cells and their descendants are marked with cyan dots.  
671 The nuclei of newly formed muscle fibers can be identified by high level of *Kaede*<sup>red</sup>  
672 expression (arrows). (C) Quantification of response types of dermomyotome cells. (D)  
673 Quantification of cell distance from the injury site in different response types. Each point  
674 represents one dermomyotome cell under injured condition (68 cells in total). Type I/II (empty  
675 dots) and III/IV (solid dots) responses represent quiescent and activated cells, respectively.  
676 Data are plotted with mean  $\pm$  SEM. Statistics: Mann-Whitney *U* test. NS: not significant. (E)  
677 Quantification of response types of dermomyotome cells with respect to their initial locations.  
678 Cells near myosepta (n=23) are more likely to generate type III/IV responses compared to  
679 cells in between myosepta (n=45). Scale bar: 50  $\mu$ m.

680

681 **Figure 6. *In vivo* dynamics of dermomyotome cells.** (A) Schematic representation of the  
682 experiment in (B). *col1a2*<sup>Kaede</sup> embryos were needle injured, photoconverted at 59 hpf, and  
683 then imaged from 0 to 23 hpi. (B) Representative snapshots from Movie 3 show the dynamics  
684 of 2 photoconverted *Kaede*<sup>red</sup> cells during first 23 hours of regeneration. Both cells were  
685 within the muscle injury area, which spanned two somites (outlined by dash lines). Cell “a”  
686 (white arrows) maintained the ramified morphology, and divided once at 7 hpi generating two  
687 daughter cells with similar morphologies. By contrast, cell “b” (yellow arrows) extended to  
688 form an elongated morphology (arrowheads), and divided once at 16 hpi generating two  
689 polarized daughter cells. (C) Schematic representation of the experiment in (D). Mosaic  
690 *col1a2*<sup>Kaede</sup> embryos were injured at 3 dpf, and imaged from 29 to 48 hpi. (D) A *Kaede*<sup>+</sup>  
691 dermomyotome cell (arrows) near the injury site (asterisks) elongated at 34 hpi (white  
692 arrowheads), formed protrusions at 39 hpi, and fused with a neighboring muscle fiber at 40  
693 hpi. The newly formed muscle fiber can be visualized by the weak Kaede expression  
694 throughout the muscle fiber and the strong Kaede expression in the nucleus (yellow  
695 arrowheads). Scale bars: 50  $\mu$ m.

696

697 **Figure 7. *col1a2*<sup>+</sup> dermomyotome cells generate new muscle fibers primarily by cell**  
698 **fusion.** (A) Schematics of lineage tracing experiments. *col1a2*<sup>Cre-ERT2</sup>; *ubi:Switch* embryos  
699 treated with 4-OHT for 3.5 hours at 3 dpf were either needle injured or left uninjured (controls)

700 and imaged 75 hours after the 4-OHT treatment. (B) Two possible modes of new muscle fiber  
701 formation. Cell fusion would generate an *mCherry*<sup>+</sup>*EGFP*<sup>+</sup> fiber (yellow), whereas *de novo*  
702 fiber formation would result in an *mCherry*<sup>+</sup>*EGFP* fiber (red). (C) Quantification of two modes  
703 of new fiber formation in control and injured embryos. (D) In control embryos, new muscle  
704 fibers were formed primarily through cell fusion (arrows), whereas in injured embryos, new  
705 fibers were generated by both fusion (arrows) and occasionally *de novo* fiber formation  
706 (arrowheads). (E) Schematics of dermatomyotome ablation experiment. (F) *col1a2*<sup>NTR-mCherry</sup> or  
707 control embryos treated with MTZ at 2-3 dpf were injured at 3 dpf and stained for *myoD*  
708 expression at 24 hpi. All control embryos (38/38) displayed significant *myoD* upregulation  
709 (arrow), while most ablated embryos (68/88) showed no specific *myoD* induction at the injury  
710 site (asterisk). (G) Model of muscle injury repair by dermatomyotome cells. Upon muscle injury  
711 (1), activated dermatomyotome cells transform from the ramified morphology to a highly  
712 polarized morphology extending long cellular projections along muscle fibers (2). The  
713 activated cell proliferates to generate more elongated daughter cells (3), some of which fuse  
714 with an existing muscle fiber to regenerate the damaged region (4). Scale bars: 50  $\mu\text{m}$ .

715 **SUPPLEMENTARY INFORMATION**

716

717 **Figure S1. Validation of the *col1a2*<sup>Kaede</sup> line.** Double fluorescent in situ hybridization using  
718 *kaede* and *col1a2* probes were performed in *col1a2*<sup>Kaede</sup> embryos at 3 dpf. Co-expression of  
719 *kaede* (green) and the endogenous *col1a2* (red) can be observed in dermomyotome cells  
720 (white arrows), tenocytes along the vertical myoseptum (yellow arrows), and deep interstitial  
721 cells around the notochord (cyan arrows). Note that *col1a2*<sup>Kaede</sup> was not expressed in the skin  
722 cells (arrowheads) as *col1a2*. Scale bar: 50  $\mu$ m.

723

724 **Figure S2. ECM molecules are upregulated during muscle injury repair.** Wild-type  
725 embryos were needle stabbed to injure a somite near the end of yolk extension (asterisks) at  
726 3dpf, and fixed at 7, 24, 48, and 76 hpi. Embryos were then stained with ECM markers  
727 (*col1a1a*, *cilp*, *postnb*, and *sparc*). All markers showed upregulation at the site of injury  
728 starting from 24 hpi (arrows). Scale bars: 50  $\mu$ m.

729

730 **Figure S3. Kaede protein is preferentially localized in nuclei of muscle fibers.** (A) Wild-  
731 type embryos were injected with Kaede mRNA, and imaged at 66 hpf. Kaede protein (green)  
732 is preferentially localized in the nuclei of muscle fibers (arrow). (B) *col1a2*<sup>Kaede</sup> embryos were  
733 injured at 3 dpf, and stained at 48 hpi with the anti-Pax7 antibody (green). *Kaede*<sup>+</sup>  
734 dermomyotome derived cells (red) contributed to muscle injury repair (boxed regions). The  
735 expanded views show that newly formed muscle fiber displayed strong Kaede expression in  
736 the nucleus (arrows), which was not labelled by Pax7. By contrast, a small elongated *Kaede*<sup>+</sup>  
737 cell between muscle fibers was Pax7 positive (arrowheads). (C) Quantification of clone size  
738 in single cell clonal analysis described in Fig 5. Dermomyotome cells under the injury  
739 condition (blue, n=68) tend to generate larger clones compared to cells in the wild-type  
740 condition (green, n=65). Scale bars: 50  $\mu$ m.

741

742 **Movie 1. Expression pattern of the *col1a2* transgenic line.** A confocal z-stack of  
743 *col1a2:Gal4; UAS:NTR-mCherry;  $\alpha$ -actin:GFP* embryos at 3 dpf shows mCherry expression  
744 (green) in dermomyotome cells, some muscle fibers, tenocytes and notochord-associated  
745 cells (arrows). Muscle fibers are labeled with  *$\alpha$ -actin:GFP* (magenta). Scale bar: 50  $\mu$ m.

746

747 **Movie 2. Dynamics *col1a2*<sup>+</sup> dermomyotome cells in quiescent state.** *col1a2:Gal4*;  
748 *UAS:NTR-mCherry*; *UAS:Kaede* embryos were imaged at 2 dpf for 7.9 hours. *col1a2*<sup>+</sup>  
749 dermomyotome cells cover the entire surface of a somite. When a dermomyotome cell  
750 divides, daughter cells reclaim the same surface area soon after division. Five different cell  
751 divisions are indicated by arrows. Scale bars: 50  $\mu\text{m}$ .

752

753 **Movie 3. Dynamics *col1a2*<sup>+</sup> dermomyotome cells in injured condition.** *col1a2*<sup>Kaede</sup>  
754 embryos were injured, photoconverted at 59 hpf, and then imaged over 23 hours (0-23 hpi).  
755 Cells “a” and “b” were within the injured area while the cell “c” was in the uninjured area. Cell  
756 “a” (white arrows) maintained the ramified morphology, and divided once at 7 hpi generating  
757 two daughter cells with similar morphologies. By contrast, cell “b” (yellow arrows) extended to  
758 form an elongated morphology (arrowheads), and divided once at 16 hpi generating two  
759 polarized daughter cells. Cell “c” (cyan arrows) did not divide and remained its ramified  
760 morphology. Scale bars: 50  $\mu\text{m}$ .

761

762 **Movie 4. Generation of new muscle fibers by cell fusion.** *col1a2*<sup>Kaede</sup> fish was injured at 3  
763 dpf and imaged from 29 hpi onwards. A *Kaede*<sup>+</sup> dermomyotome cell (arrows) near the injury  
764 site elongated at 34 hpi (white arrowheads), formed protrusions at 39 hpi, and fused with a  
765 neighboring muscle fiber at 40 hpi. The newly formed muscle fiber can be identified by the  
766 weak *Kaede* expression throughout the muscle fiber and the strong *Kaede* expression in the  
767 nucleus (yellow arrowheads). Scale bars: 50  $\mu\text{m}$ .

768

769 **REFERENCES**

770

771 **Akitake, C. M., Macurak, M., Halpern, M. E. and Goll, M. G.** (2011). Transgenerational  
772 analysis of transcriptional silencing in zebrafish. *Dev Biol* **352**, 191-201.

773 **Ando, R., Hama, H., Yamamoto-Hino, M., Mizuno, H. and Miyawaki, A.** (2002). An optical  
774 marker based on the UV-induced green-to-red photoconversion of a fluorescent  
775 protein. *Proc Natl Acad Sci U S A* **99**, 12651-12656.

776 **Baghdadi, M. B., Castel, D., Machado, L., Fukada, S. I., Birk, D. E., Relaix, F., Tajbakhsh,**  
777 **S. and Mourikis, P.** (2018). Reciprocal signalling by Notch-Collagen V-CALCR retains  
778 muscle stem cells in their niche. *Nature* **557**, 714-718.

779 **Bentzinger, C. F., von Maltzahn, J., Dumont, N. A., Stark, D. A., Wang, Y. X., Nhan, K.,**  
780 **Frenette, J., Cornelison, D. D. and Rudnicki, M. A.** (2014). Wnt7a stimulates  
781 myogenic stem cell motility and engraftment resulting in improved muscle strength. *J*  
782 *Cell Biol* **205**, 97-111.

783 **Bentzinger, C. F., Wang, Y. X., Dumont, N. A. and Rudnicki, M. A.** (2013a). Cellular  
784 dynamics in the muscle satellite cell niche. *EMBO Rep* **14**, 1062-1072.

785 **Bentzinger, C. F., Wang, Y. X., von Maltzahn, J., Soleimani, V. D., Yin, H. and Rudnicki,**  
786 **M. A.** (2013b). Fibronectin regulates Wnt7a signaling and satellite cell expansion. *Cell*  
787 *Stem Cell* **12**, 75-87.

788 **Bussmann, J. and Schulte-Merker, S.** (2011). Rapid BAC selection for tol2-mediated  
789 transgenesis in zebrafish. *Development* **138**, 4327-4332.

790 **Christ, B. and Scaal, M.** (2008). Formation and differentiation of avian somite derivatives.  
791 *Adv Exp Med Biol* **638**, 1-41.

792 **Curado, S., Stainier, D. Y. and Anderson, R. M.** (2008). Nitroreductase-mediated cell/tissue  
793 ablation in zebrafish: a spatially and temporally controlled ablation method with  
794 applications in developmental and regeneration studies. *Nat Protoc* **3**, 948-954.

795 **Davison, J. M., Akitake, C. M., Goll, M. G., Rhee, J. M., Gosse, N., Baier, H., Halpern, M.**  
796 **E., Leach, S. D. and Parsons, M. J.** (2007). Transactivation from Gal4-VP16  
797 transgenic insertions for tissue-specific cell labeling and ablation in zebrafish. *Dev Biol*  
798 **304**, 811-824.

- 799 **Devoto, S. H., Stoiber, W., Hammond, C. L., Steinbacher, P., Haslett, J. R., Barresi, M.**  
800 **J., Patterson, S. E., Adiarte, E. G. and Hughes, S. M.** (2006). Generality of  
801 vertebrate developmental patterns: evidence for a dermomyotome in fish. *Evol Dev* **8**,  
802 101-110.
- 803 **Dumont, N. A., Bentzinger, C. F., Sincennes, M. C. and Rudnicki, M. A.** (2015). Satellite  
804 Cells and Skeletal Muscle Regeneration. *Compr Physiol* **5**, 1027-1059.
- 805 **El Fahime, E., Torrente, Y., Caron, N. J., Bresolin, M. D. and Tremblay, J. P.** (2000). In  
806 vivo migration of transplanted myoblasts requires matrix metalloproteinase activity.  
807 *Exp Cell Res* **258**, 279-287.
- 808 **Feng, X., Adiarte, E. G. and Devoto, S. H.** (2006). Hedgehog acts directly on the zebrafish  
809 dermomyotome to promote myogenic differentiation. *Dev Biol* **300**, 736-746.
- 810 **Fry, C. S., Kirby, T. J., Kosmac, K., McCarthy, J. J. and Peterson, C. A.** (2017). Myogenic  
811 Progenitor Cells Control Extracellular Matrix Production by Fibroblasts during Skeletal  
812 Muscle Hypertrophy. *Cell Stem Cell* **20**, 56-69.
- 813 **Gros, J., Manceau, M., Thomé, V. and Marcelle, C.** (2005). A common somitic origin for  
814 embryonic muscle progenitors and satellite cells. *Nature* **435**, 954-958.
- 815 **Grueber, W. B. and Sagasti, A.** (2010). Self-avoidance and tiling: Mechanisms of dendrite  
816 and axon spacing. *Cold Spring Harb Perspect Biol* **2**, a001750.
- 817 **Gurevich, D. B., Nguyen, P. D., Siegel, A. L., Ehrlich, O. V., Sonntag, C., Phan, J. M.,**  
818 **Berger, S., Ratnayake, D., Hersey, L., Berger, J., et al.** (2016). Asymmetric division  
819 of clonal muscle stem cells coordinates muscle regeneration in vivo. *Science* **353**,  
820 aad9969.
- 821 **Hammond, C. L., Hinits, Y., Osborn, D. P., Minchin, J. E., Tettamanti, G. and Hughes, S.**  
822 **M.** (2007). Signals and myogenic regulatory factors restrict pax3 and pax7 expression  
823 to dermomyotome-like tissue in zebrafish. *Dev Biol* **302**, 504-521.
- 824 **Higashijima, S., Okamoto, H., Ueno, N., Hotta, Y. and Eguchi, G.** (1997). High-frequency  
825 generation of transgenic zebrafish which reliably express GFP in whole muscles or the  
826 whole body by using promoters of zebrafish origin. *Dev Biol* **192**, 289-299.
- 827 **Hollway, G. E., Bryson-Richardson, R. J., Berger, S., Cole, N. J., Hall, T. E. and Currie,**  
828 **P. D.** (2007). Whole-somite rotation generates muscle progenitor cell compartments in  
829 the developing zebrafish embryo. *Dev Cell* **12**, 207-219.

- 830 **Jockusch, H. and Voigt, S.** (2003). Migration of adult myogenic precursor cells as revealed  
831 by GFP/nLacZ labelling of mouse transplantation chimeras. *J Cell Sci* **116**, 1611-1616.
- 832 **Kassar-Duchossoy, L., Giacone, E., Gayraud-Morel, B., Jory, A., Gomès, D. and**  
833 **Tajbakhsh, S.** (2005). Pax3/Pax7 mark a novel population of primitive myogenic cells  
834 during development. *Genes Dev* **19**, 1426-1431.
- 835 **Kimmel, C. B., Ballard, W. W., Kimmel, S. R., Ullmann, B. and Schilling, T. F.** (1995).  
836 Stages of embryonic development of the zebrafish. *Dev Dyn* **203**, 253-310.
- 837 **Knappe, S., Zammit, P. S. and Knight, R. D.** (2015). A population of Pax7-expressing  
838 muscle progenitor cells show differential responses to muscle injury dependent on  
839 developmental stage and injury extent. *Front Aging Neurosci* **7**, 161.
- 840 **Kuang, S., Kuroda, K., Le Grand, F. and Rudnicki, M. A.** (2007). Asymmetric self-renewal  
841 and commitment of satellite stem cells in muscle. *Cell* **129**, 999-1010.
- 842 **Le Guellec, D., Morvan-Dubois, G. and Sire, J. Y.** (2004). Skin development in bony fish  
843 with particular emphasis on collagen deposition in the dermis of the zebrafish (*Danio*  
844 *rerio*). *Int J Dev Biol* **48**, 217-231.
- 845 **Lepper, C., Partridge, T. A. and Fan, C. M.** (2011). An absolute requirement for Pax7-  
846 positive satellite cells in acute injury-induced skeletal muscle regeneration.  
847 *Development* **138**, 3639-3646.
- 848 **Liu, N., Garry, G. A., Li, S., Bezprozvannaya, S., Sanchez-Ortiz, E., Chen, B., Shelton, J.**  
849 **M., Jaichander, P., Bassel-Duby, R. and Olson, E. N.** (2017). A Twist2-dependent  
850 progenitor cell contributes to adult skeletal muscle. *Nat Cell Biol* **19**, 202-213.
- 851 **Love, N. R., Chen, Y., Ishibashi, S., Kritsiligkou, P., Lea, R., Koh, Y., Gallop, J. L., Dorey,**  
852 **K. and Amaya, E.** (2013). Amputation-induced reactive oxygen species are required  
853 for successful *Xenopus* tadpole tail regeneration. *Nat Cell Biol* **15**, 222-228.
- 854 **Mosimann, C., Kaufman, C. K., Li, P., Pugach, E. K., Tamplin, O. J. and Zon, L. I.** (2011).  
855 Ubiquitous transgene expression and Cre-based recombination driven by the ubiquitin  
856 promoter in zebrafish. *Development* **138**, 169-177.
- 857 **Murphy, M. M., Lawson, J. A., Mathew, S. J., Hutcheson, D. A. and Kardon, G.** (2011).  
858 Satellite cells, connective tissue fibroblasts and their interactions are crucial for muscle  
859 regeneration. *Development* **138**, 3625-3637.



- 860 **Nguyen, P. D., Gurevich, D. B., Sonntag, C., Hersey, L., Alaei, S., Nim, H. T., Siegel, A.,**  
861 **Hall, T. E., Rossello, F. J., Boyd, S. E., et al.** (2017). Muscle Stem Cells Undergo  
862 Extensive Clonal Drift during Tissue Growth via Meox1-Mediated Induction of G2 Cell-  
863 Cycle Arrest. *Cell Stem Cell* **21**, 107-119.e106.
- 864 **Niethammer, P., Grabher, C., Look, A. T. and Mitchison, T. J.** (2009). A tissue-scale  
865 gradient of hydrogen peroxide mediates rapid wound detection in zebrafish. *Nature*  
866 **459**, 996-999.
- 867 **Pallafacchina, G., François, S., Regnault, B., Czarny, B., Dive, V., Cumano, A.,**  
868 **Montarras, D. and Buckingham, M.** (2010). An adult tissue-specific stem cell in its  
869 niche: a gene profiling analysis of in vivo quiescent and activated muscle satellite cells.  
870 *Stem Cell Res* **4**, 77-91.
- 871 **Pipalia, T. G., Koth, J., Roy, S. D., Hammond, C. L., Kawakami, K. and Hughes, S. M.**  
872 (2016). Cellular dynamics of regeneration reveals role of two distinct Pax7 stem cell  
873 populations in larval zebrafish muscle repair. *Dis Model Mech* **9**, 671-684.
- 874 **Pisharath, H., Rhee, J. M., Swanson, M. A., Leach, S. D. and Parsons, M. J.** (2007).  
875 Targeted ablation of beta cells in the embryonic zebrafish pancreas using E. coli  
876 nitroreductase. *Mech Dev* **124**, 218-229.
- 877 **Ralliere, C., Fretaud, M., Thermes, V. and Rescan, P. Y.** (2015). CILP1 is dynamically  
878 expressed in the developing musculoskeletal system of the trout. *Int J Dev Biol* **59**,  
879 505-509.
- 880 **Ratnayake, D. and Currie, P. D.** (2017). Stem cell dynamics in muscle regeneration: Insights  
881 from live imaging in different animal models. *Bioessays* **39**.
- 882 **Rayagiri, S. S., Ranaldi, D., Raven, A., Mohamad Azhar, N. I. F., Lefebvre, O., Zammit, P.**  
883 **S. and Borycki, A. G.** (2018). Basal lamina remodeling at the skeletal muscle stem  
884 cell niche mediates stem cell self-renewal. *Nat Commun* **9**, 1075.
- 885 **Relaix, F., Rocancourt, D., Mansouri, A. and Buckingham, M.** (2005). A Pax3/Pax7-  
886 dependent population of skeletal muscle progenitor cells. *Nature* **435**, 948-953.
- 887 **Rescan, P. Y., Ralliere, C., Chauvigné, F. and Cauty, C.** (2005). Expression patterns of  
888 collagen I (alpha1) encoding gene and muscle-specific genes reveal that the lateral  
889 domain of the fish somite forms a connective tissue surrounding the myotome. *Dev*  
890 *Dyn* **233**, 605-611.

- 891 **Roy, S. D., Williams, V. C., Pipalia, T. G., Li, K., Hammond, C. L., Knappe, S., Knight, R.**  
892 **D. and Hughes, S. M.** (2017). Myotome adaptability confers developmental  
893 robustness to somitic myogenesis in response to fibre number alteration. *Dev Biol* **431**,  
894 321-335.
- 895 **Sacco, A., Doyonnas, R., Kraft, P., Vitorovic, S. and Blau, H. M.** (2008). Self-renewal and  
896 expansion of single transplanted muscle stem cells. *Nature* **456**, 502-506.
- 897 **Saclier, M., Yacoub-Youssef, H., Mackey, A. L., Arnold, L., Ardjoune, H., Magnan, M.,**  
898 **Sailhan, F., Chelly, J., Pavlath, G. K., Mounier, R., et al.** (2013). Differentially  
899 activated macrophages orchestrate myogenic precursor cell fate during human  
900 skeletal muscle regeneration. *Stem Cells* **31**, 384-396.
- 901 **Saga, Y. and Takeda, H.** (2001). The making of the somite: molecular events in vertebrate  
902 segmentation. *Nat Rev Genet* **2**, 835-845.
- 903 **Sagar, Pröls, F., Wiegrefe, C. and Scaal, M.** (2015). Communication between distant  
904 epithelial cells by filopodia-like protrusions during embryonic development.  
905 *Development* **142**, 665-671.
- 906 **Sambasivan, R., Yao, R., Kissenpfennig, A., Van Wittenberghe, L., Paldi, A., Gayraud-**  
907 **Morel, B., Guenou, H., Malissen, B., Tajbakhsh, S. and Galy, A.** (2011). Pax7-  
908 expressing satellite cells are indispensable for adult skeletal muscle regeneration.  
909 *Development* **138**, 3647-3656.
- 910 **Scaal, M. and Christ, B.** (2004). Formation and differentiation of the avian dermomyotome.  
911 *Anat Embryol (Berl)* **208**, 411-424.
- 912 **Scharner, J. and Zammit, P. S.** (2011). The muscle satellite cell at 50: the formative years.  
913 *Skelet Muscle* **1**, 28.
- 914 **Schienda, J., Engleka, K. A., Jun, S., Hansen, M. S., Epstein, J. A., Tabin, C. J., Kunkel,**  
915 **L. M. and Kardon, G.** (2006). Somitic origin of limb muscle satellite and side  
916 population cells. *Proc Natl Acad Sci U S A* **103**, 945-950.
- 917 **Schindelin, J., Arganda-Carreras, I., Frise, E., Kaynig, V., Longair, M., Pietzsch, T.,**  
918 **Preibisch, S., Rueden, C., Saalfeld, S., Schmid, B., et al.** (2012). Fiji: an open-  
919 source platform for biological-image analysis. *Nat Methods* **9**, 676-682.

- 920 **Scott, E. K., Mason, L., Arrenberg, A. B., Ziv, L., Gosse, N. J., Xiao, T., Chi, N. C.,**  
921 **Asakawa, K., Kawakami, K. and Baier, H. (2007).** Targeting neural circuitry in  
922 zebrafish using GAL4 enhancer trapping. *Nat Methods* **4**, 323-326.
- 923 **Seger, C., Hargrave, M., Wang, X., Chai, R. J., Elworthy, S. and Ingham, P. W. (2011).**  
924 Analysis of Pax7 expressing myogenic cells in zebrafish muscle development, injury,  
925 and models of disease. *Dev Dyn* **240**, 2440-2451.
- 926 **Seo, H. C., Saetre, B. O., Håvik, B., Ellingsen, S. and Fjose, A. (1998).** The zebrafish Pax3  
927 and Pax7 homologues are highly conserved, encode multiple isoforms and show  
928 dynamic segment-like expression in the developing brain. *Mech Dev* **70**, 49-63.
- 929 **Siegel, A. L., Atchison, K., Fisher, K. E., Davis, G. E. and Cornelison, D. D. (2009).** 3D  
930 timelapse analysis of muscle satellite cell motility. *Stem Cells* **27**, 2527-2538.
- 931 **Sire, J. Y. and Akimenko, M. A. (2004).** Scale development in fish: a review, with  
932 description of sonic hedgehog (shh) expression in the zebrafish (*Danio rerio*). *Int J Dev*  
933 *Biol* **48**, 233-247.
- 934 **Stellabotte, F. and Devoto, S. H. (2007).** The teleost dermomyotome. *Dev Dyn* **236**, 2432-  
935 2443.
- 936 **Stellabotte, F., Dobbs-McAuliffe, B., Fernández, D. A., Feng, X. and Devoto, S. H. (2007).**  
937 Dynamic somite cell rearrangements lead to distinct waves of myotome growth.  
938 *Development* **134**, 1253-1257.
- 939 **Thisse, B., Heyer, V., Lux, A., Alunni, V., Degrave, A., Seiliez, I., Kirchner, J., Parkhill, J.**  
940 **P. and Thisse, C. (2004).** Spatial and temporal expression of the zebrafish genome by  
941 large-scale in situ hybridization screening. *Methods Cell Biol* **77**, 505-519.
- 942 **Tierney, M. T., Gromova, A., Sesillo, F. B., Sala, D., Spenlé, C., Orend, G. and Sacco, A.**  
943 (2016). Autonomous Extracellular Matrix Remodeling Controls a Progressive  
944 Adaptation in Muscle Stem Cell Regenerative Capacity during Development. *Cell Rep*  
945 **14**, 1940-1952.
- 946 **Urciuolo, A., Quarta, M., Morbidoni, V., Gattazzo, F., Molon, S., Grumati, P.,**  
947 **Montemurro, F., Tedesco, F. S., Blaauw, B., Cossu, G., et al. (2013).** Collagen VI  
948 regulates satellite cell self-renewal and muscle regeneration. *Nat Commun* **4**, 1964.

- 949 **Webster, M. T., Manor, U., Lippincott-Schwartz, J. and Fan, C. M.** (2016). Intravital  
950 Imaging Reveals Ghost Fibers as Architectural Units Guiding Myogenic Progenitors  
951 during Regeneration. *Cell Stem Cell* **18**, 243-252.
- 952 **Westerfield, M.** (2000). *The Zebrafish Book: A Guide for the Laboratory Use of Zebrafish*  
953 *(Danio Rerio)* (4 edn): University of Oregon.
- 954

# Figure 1

bioRxiv preprint doi: <https://doi.org/10.1101/396713>; this version posted August 21, 2018. The copyright holder for this preprint (which was not certified by peer review) is the author/funder, who has granted bioRxiv a license to display the preprint in perpetuity. It is made available under aCC-BY-NC-ND 4.0 International license.

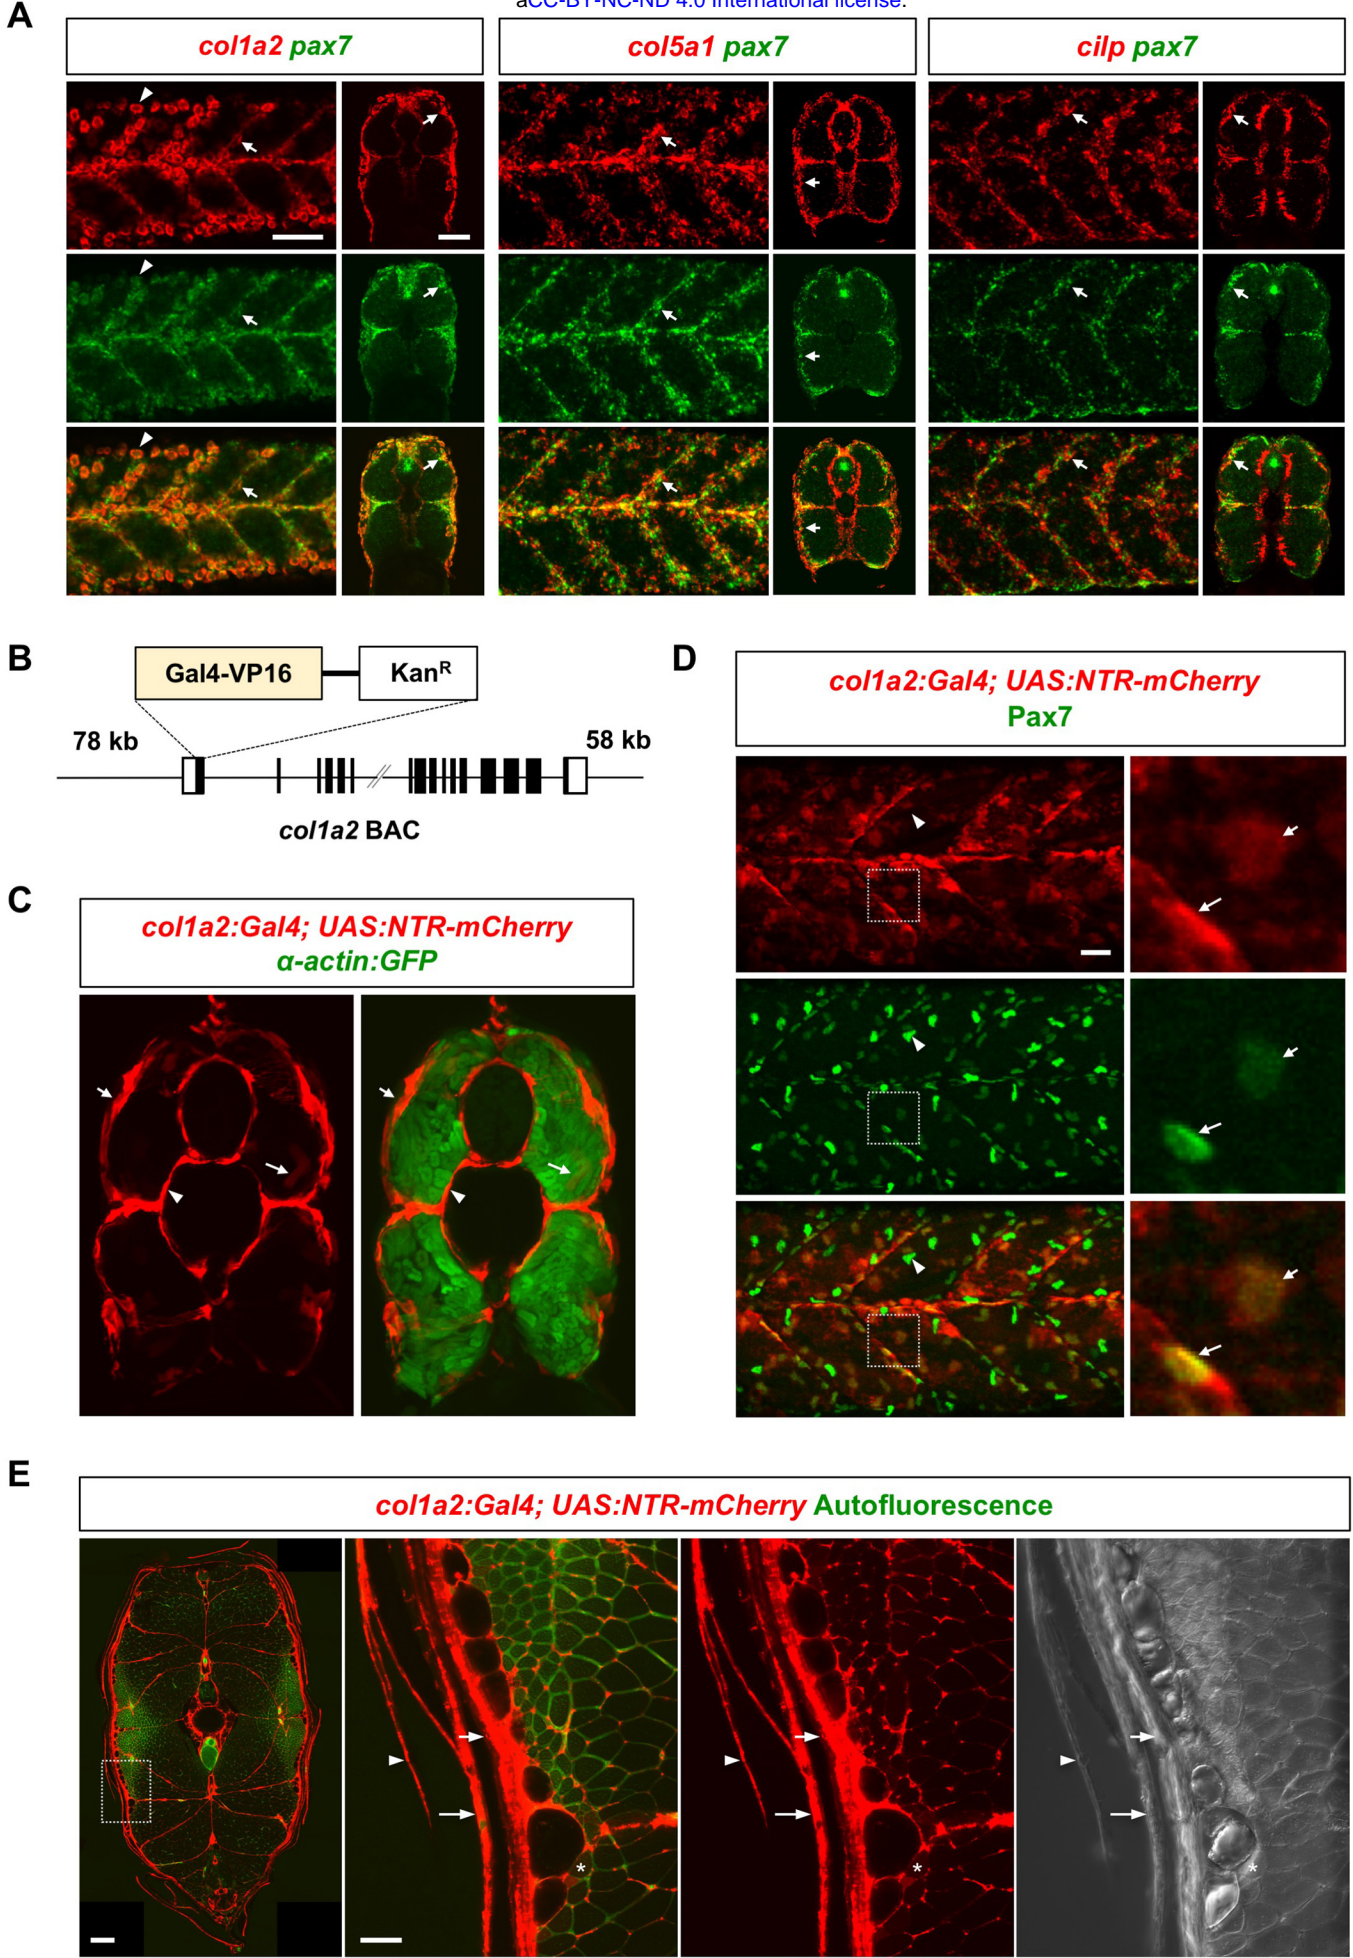

# Figure 2

bioRxiv preprint doi: <https://doi.org/10.1101/396713>; this version posted August 21, 2018. The copyright holder for this preprint (which was not certified by peer review) is the author/funder, who has granted bioRxiv a license to display the preprint in perpetuity. It is made available under aCC-BY-NC-ND 4.0 International license.

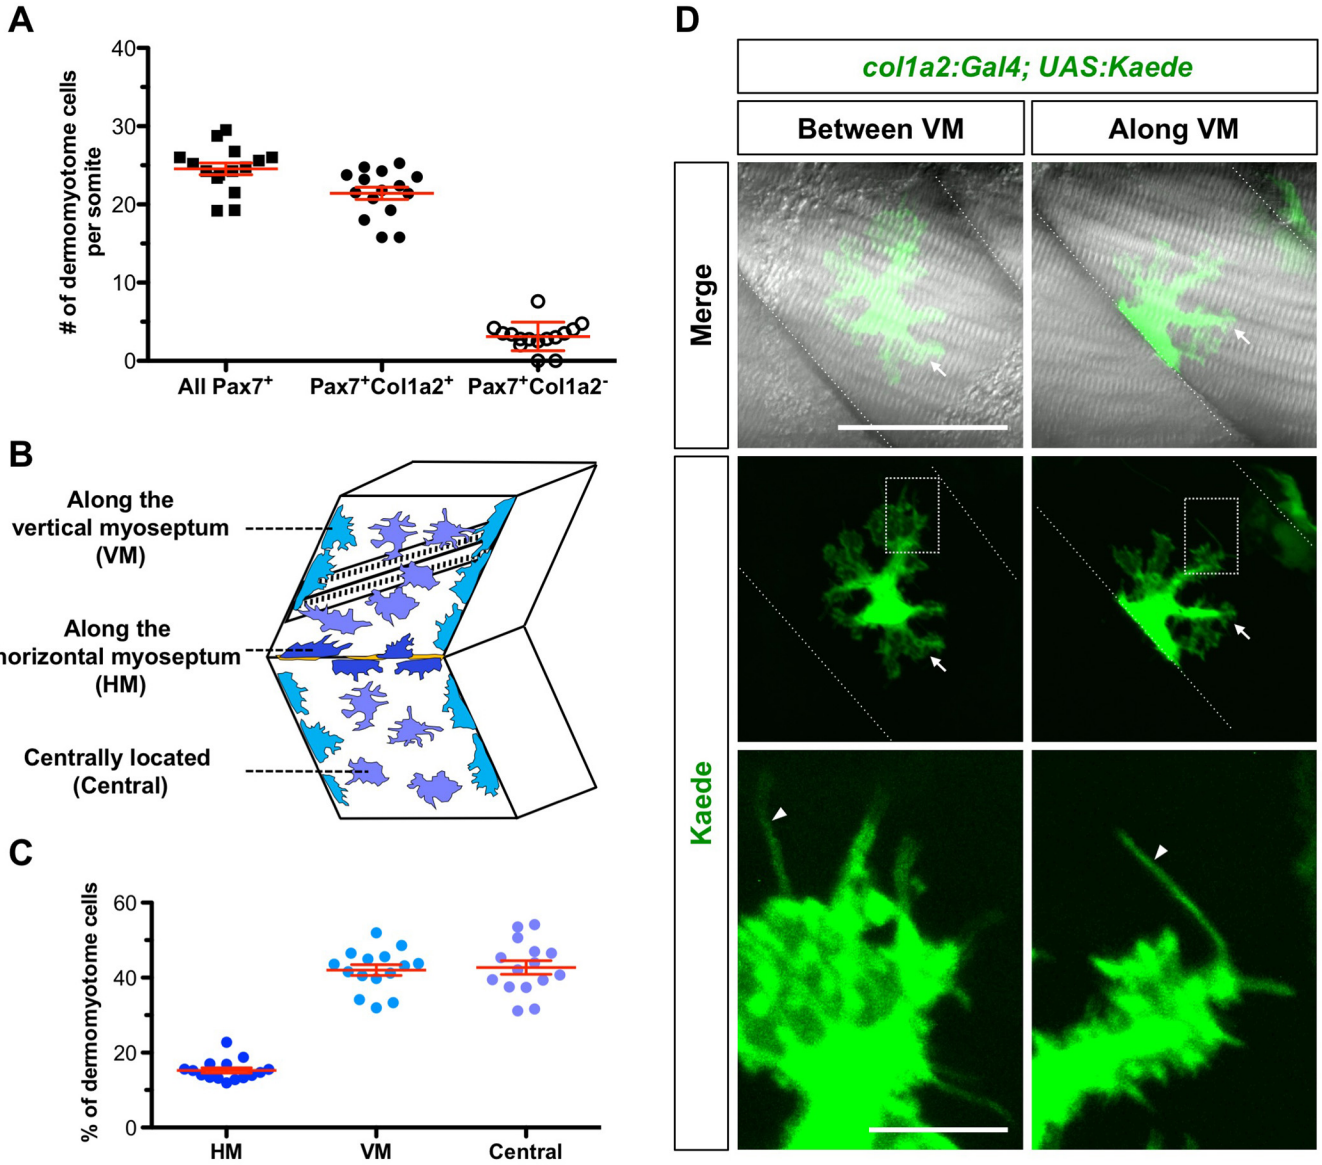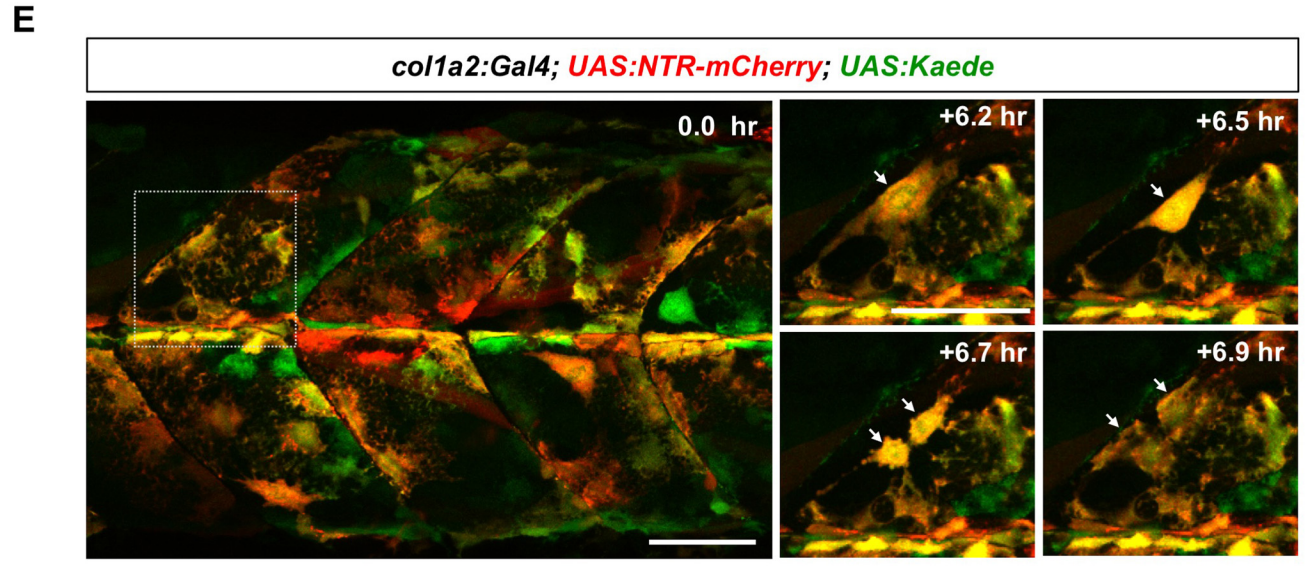

# Figure 3

bioRxiv preprint doi: <https://doi.org/10.1101/396713>; this version posted August 21, 2018. The copyright holder for this preprint (which was not certified by peer review) is the author/funder, who has granted bioRxiv a license to display the preprint in perpetuity. It is made available under aCC-BY-NC-ND 4.0 International license.

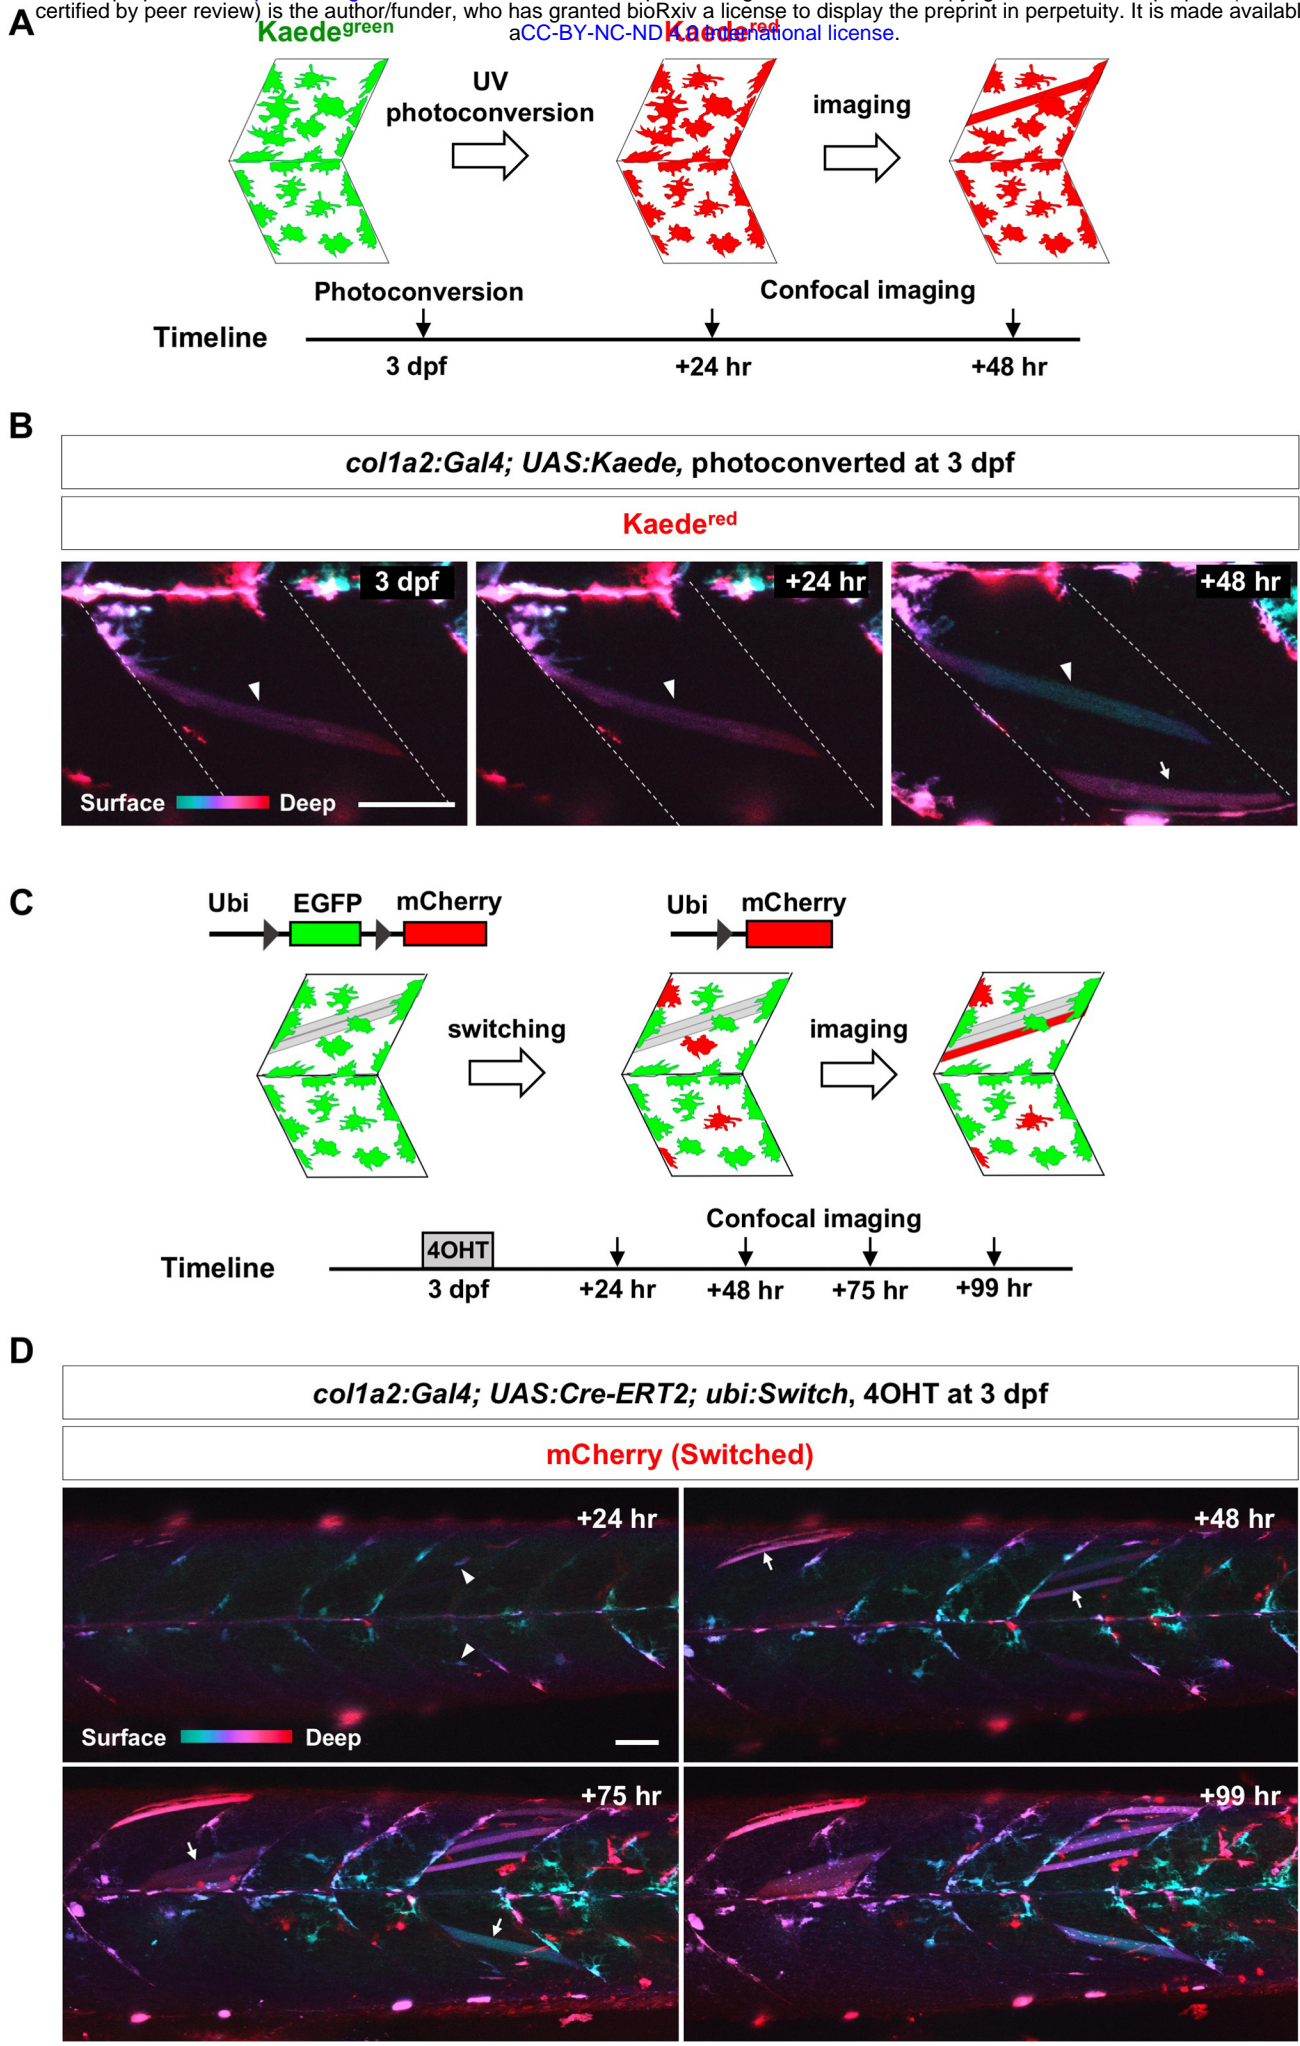

# Figure 4

bioRxiv preprint doi: <https://doi.org/10.1101/396713>; this version posted August 21, 2018. The copyright holder for this preprint (which was not certified by peer review) is the author/funder, who has granted bioRxiv a license to display the preprint in perpetuity. It is made available under aCC-BY-NC-ND 4.0 International license.

**A**

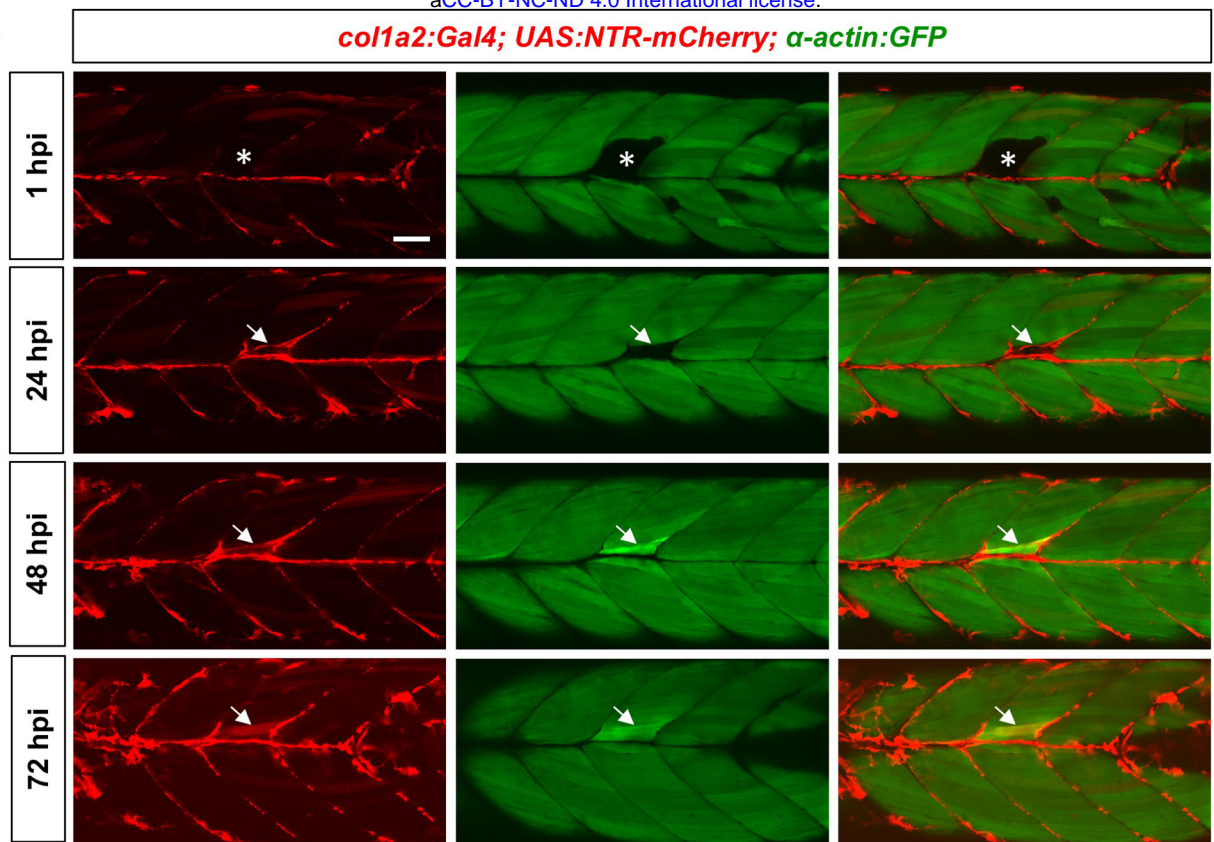

**B**

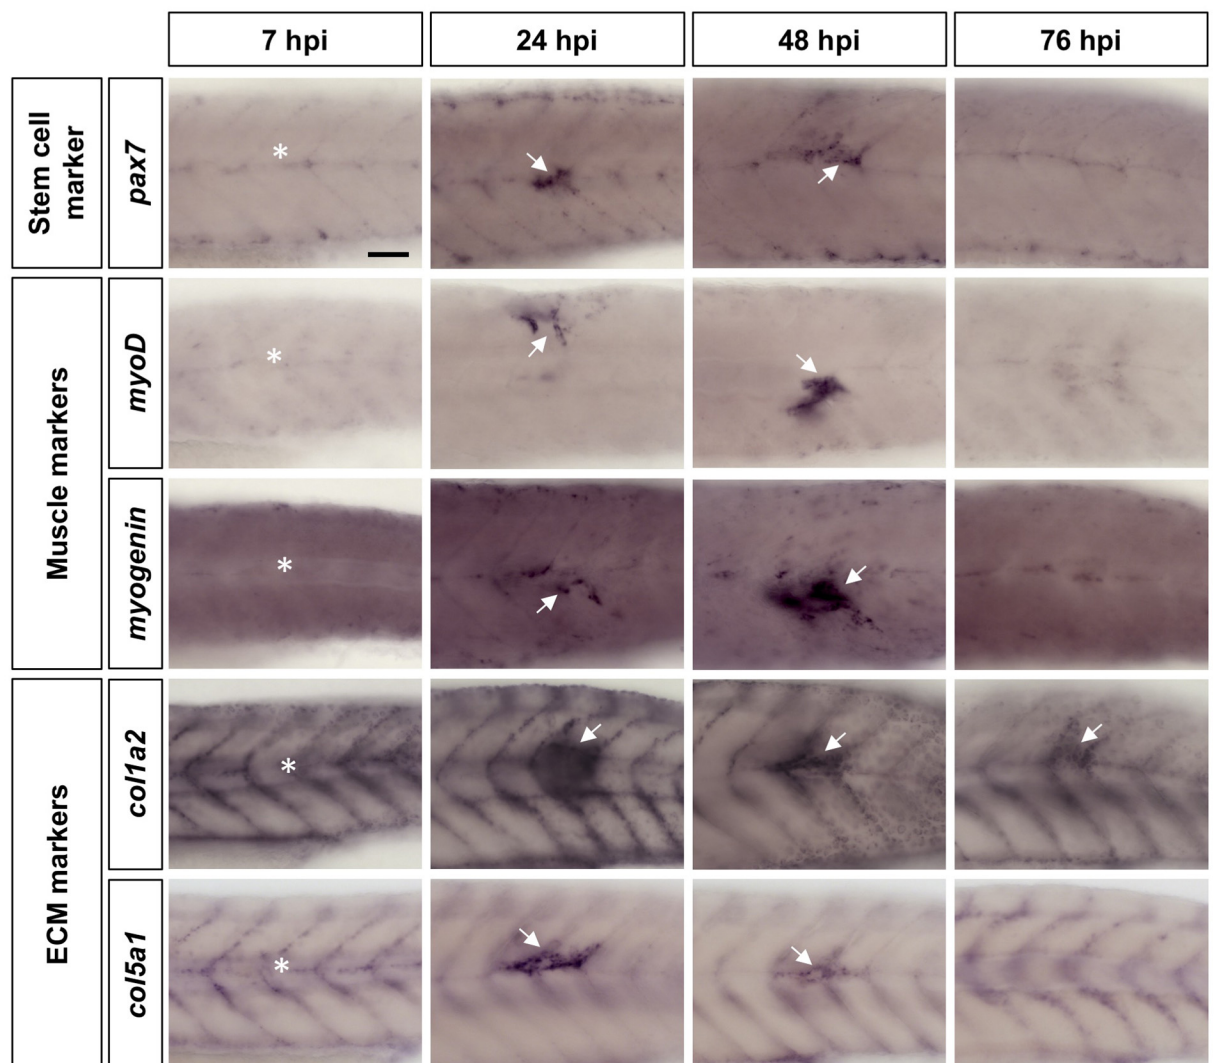



# Figure 5

bioRxiv preprint doi: <https://doi.org/10.1101/396713>; this version posted August 21, 2018. The copyright holder for this preprint (which was not certified by peer review) is the author/funder, who has granted bioRxiv a license to display the preprint in perpetuity. It is made available under aCC-BY-NC-ND 4.0 International license.

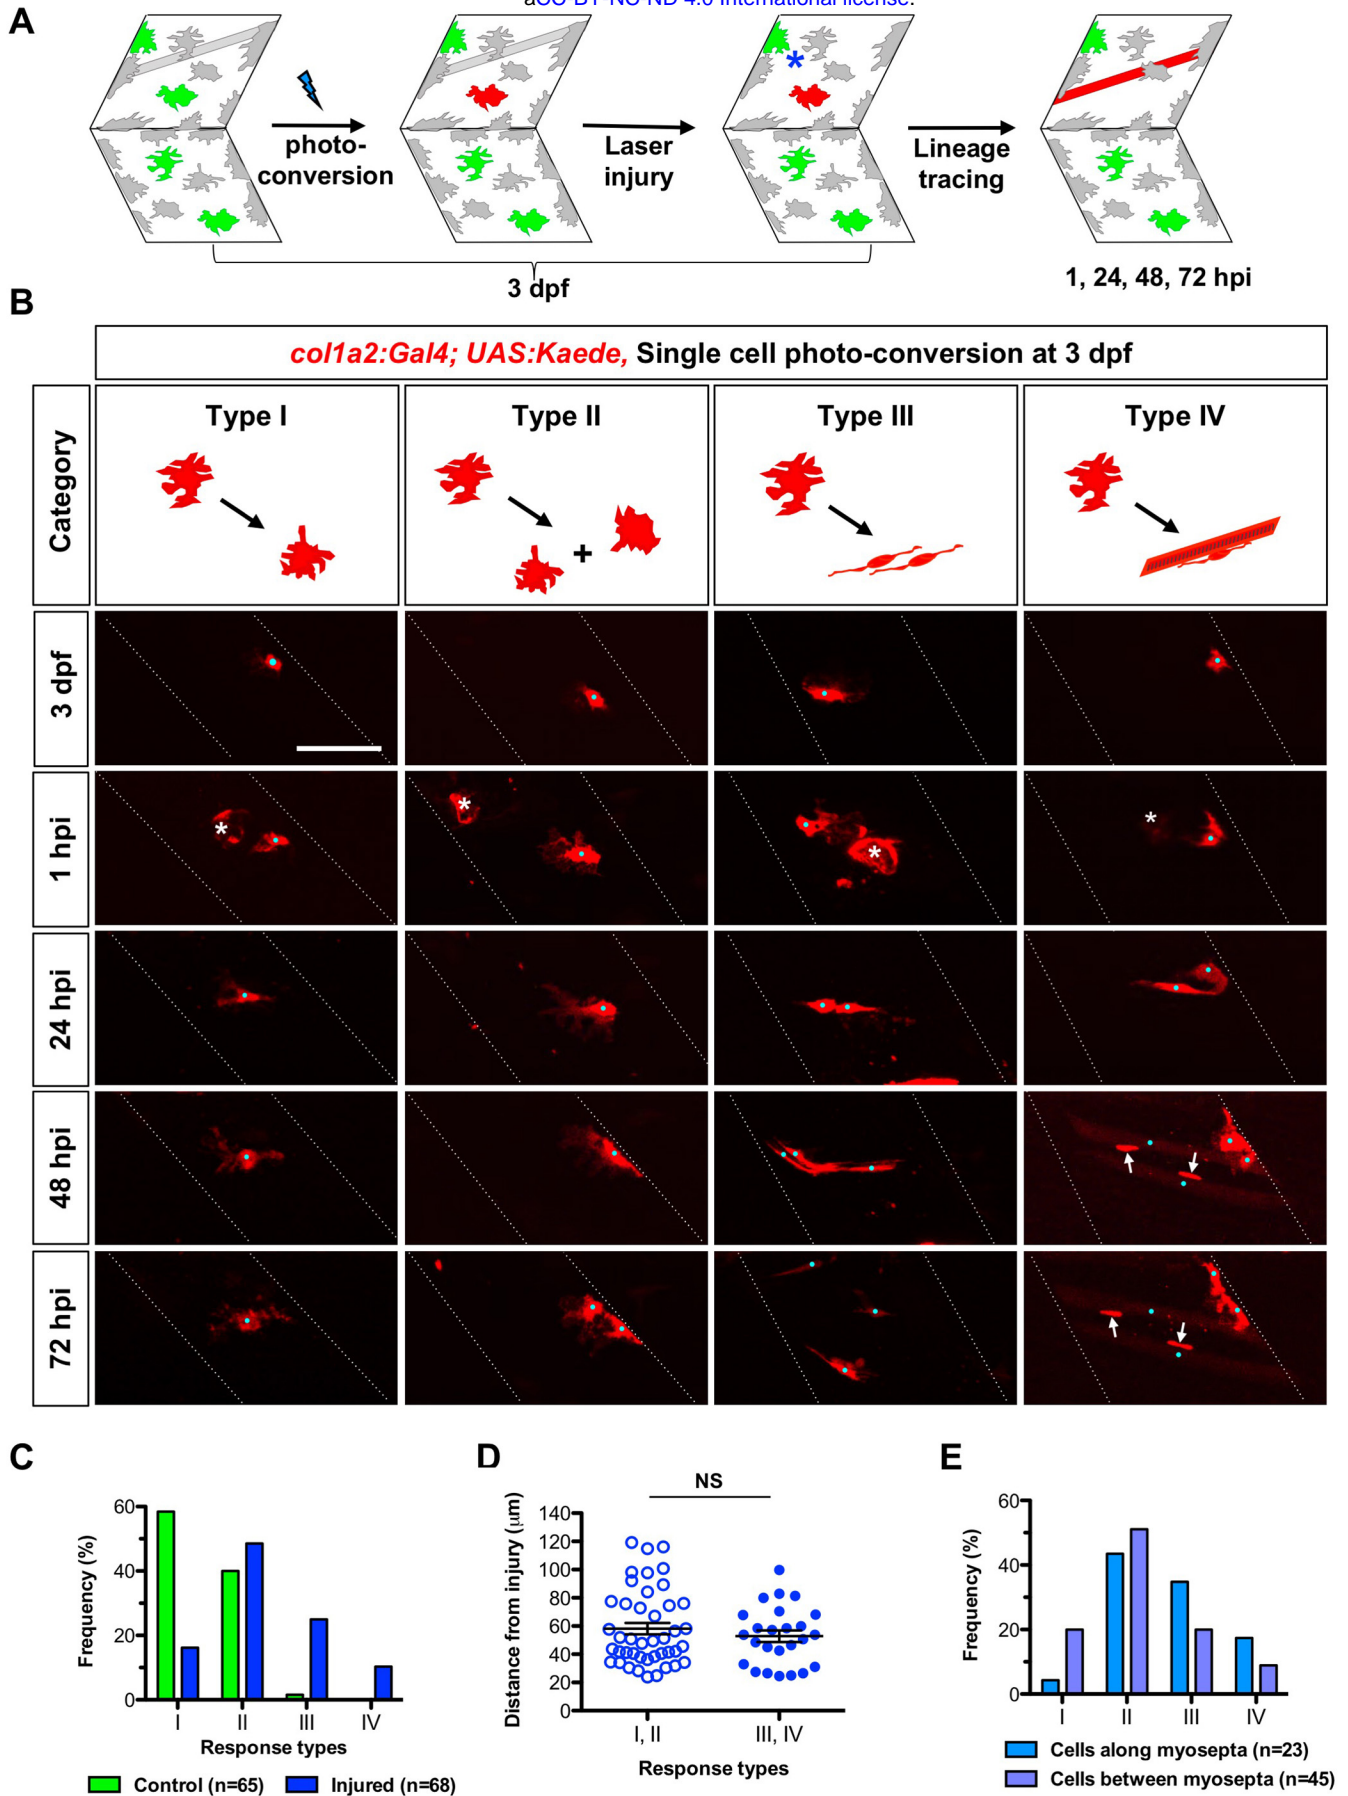

# Figure 6

bioRxiv preprint doi: <https://doi.org/10.1101/396713>; this version posted August 21, 2018. The copyright holder for this preprint (which was not certified by peer review) is the author/funder, who has granted bioRxiv a license to display the preprint in perpetuity. It is made available under aCC-BY-NC-ND 4.0 International license.

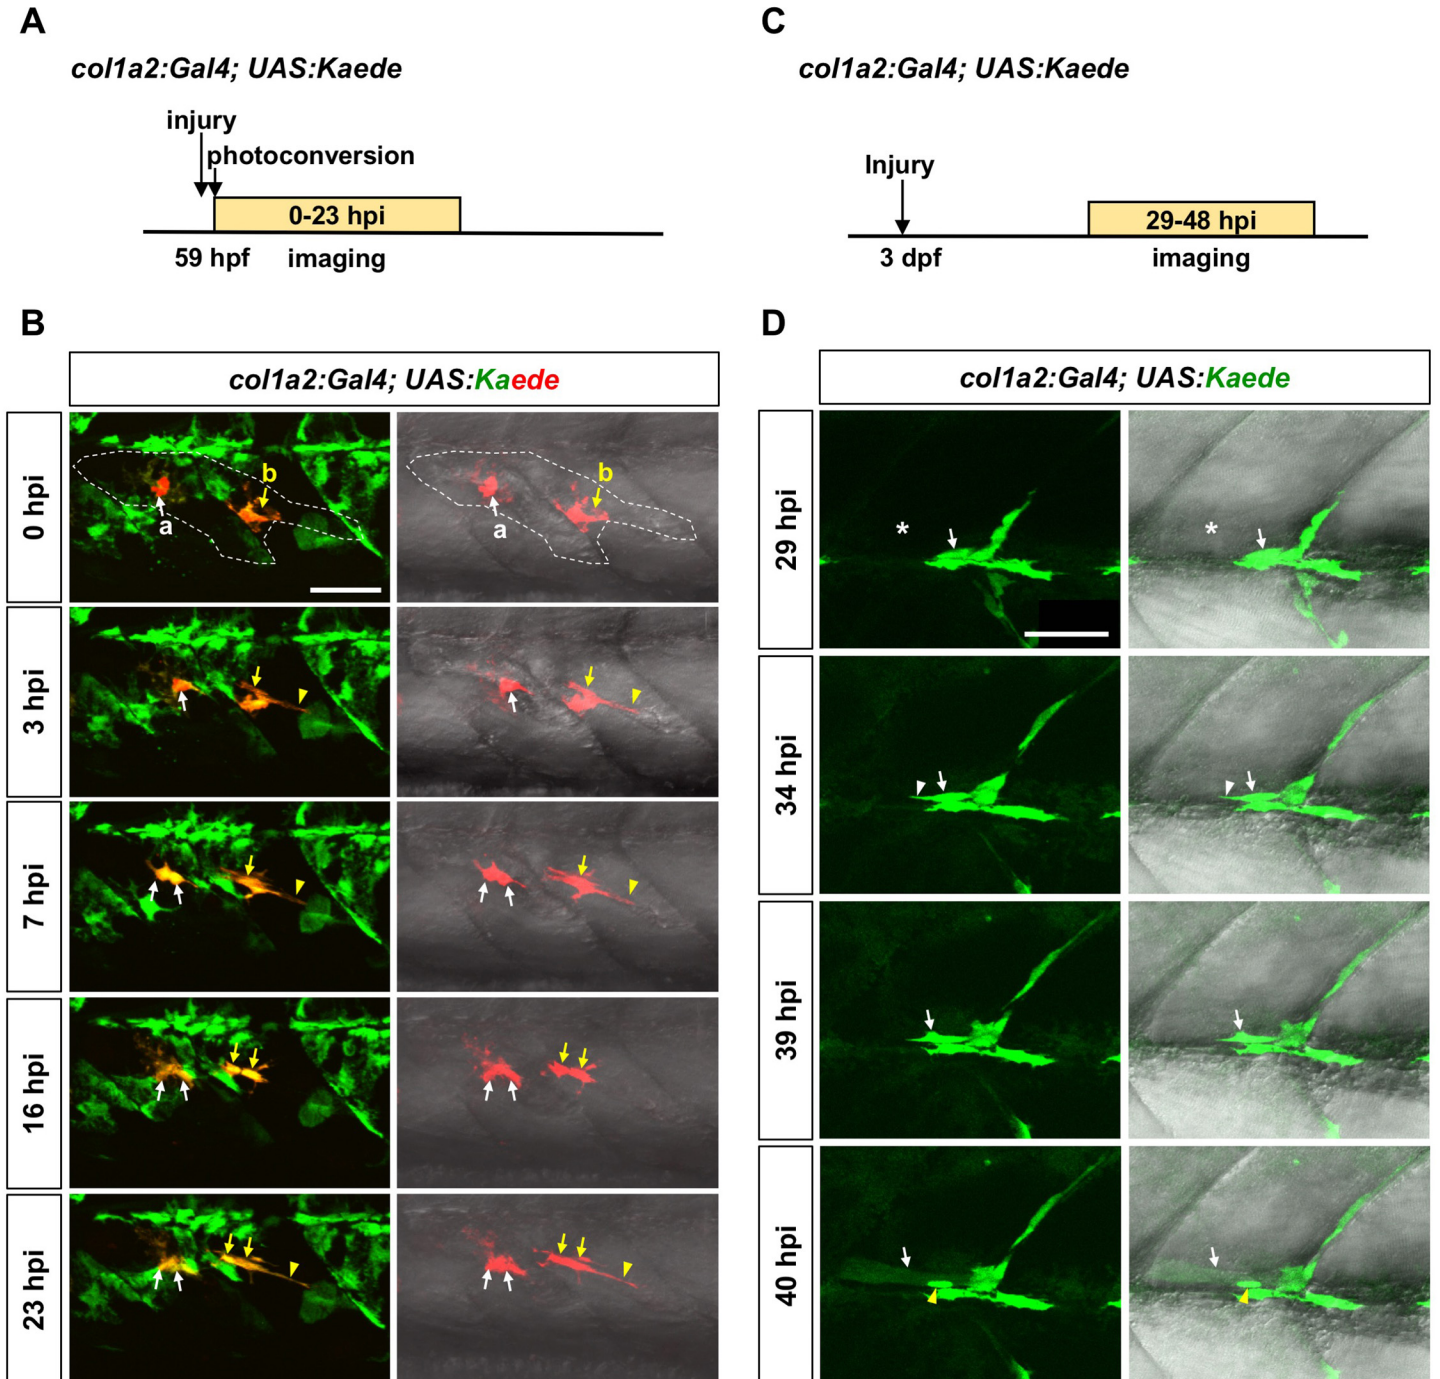

# Figure 7

bioRxiv preprint doi: <https://doi.org/10.1101/396713>; this version posted August 21, 2018. The copyright holder for this preprint (which was not certified by peer review) is the author/funder, who has granted bioRxiv a license to display the preprint in perpetuity. It is made available under aCC-BY-NC-ND 4.0 International license.

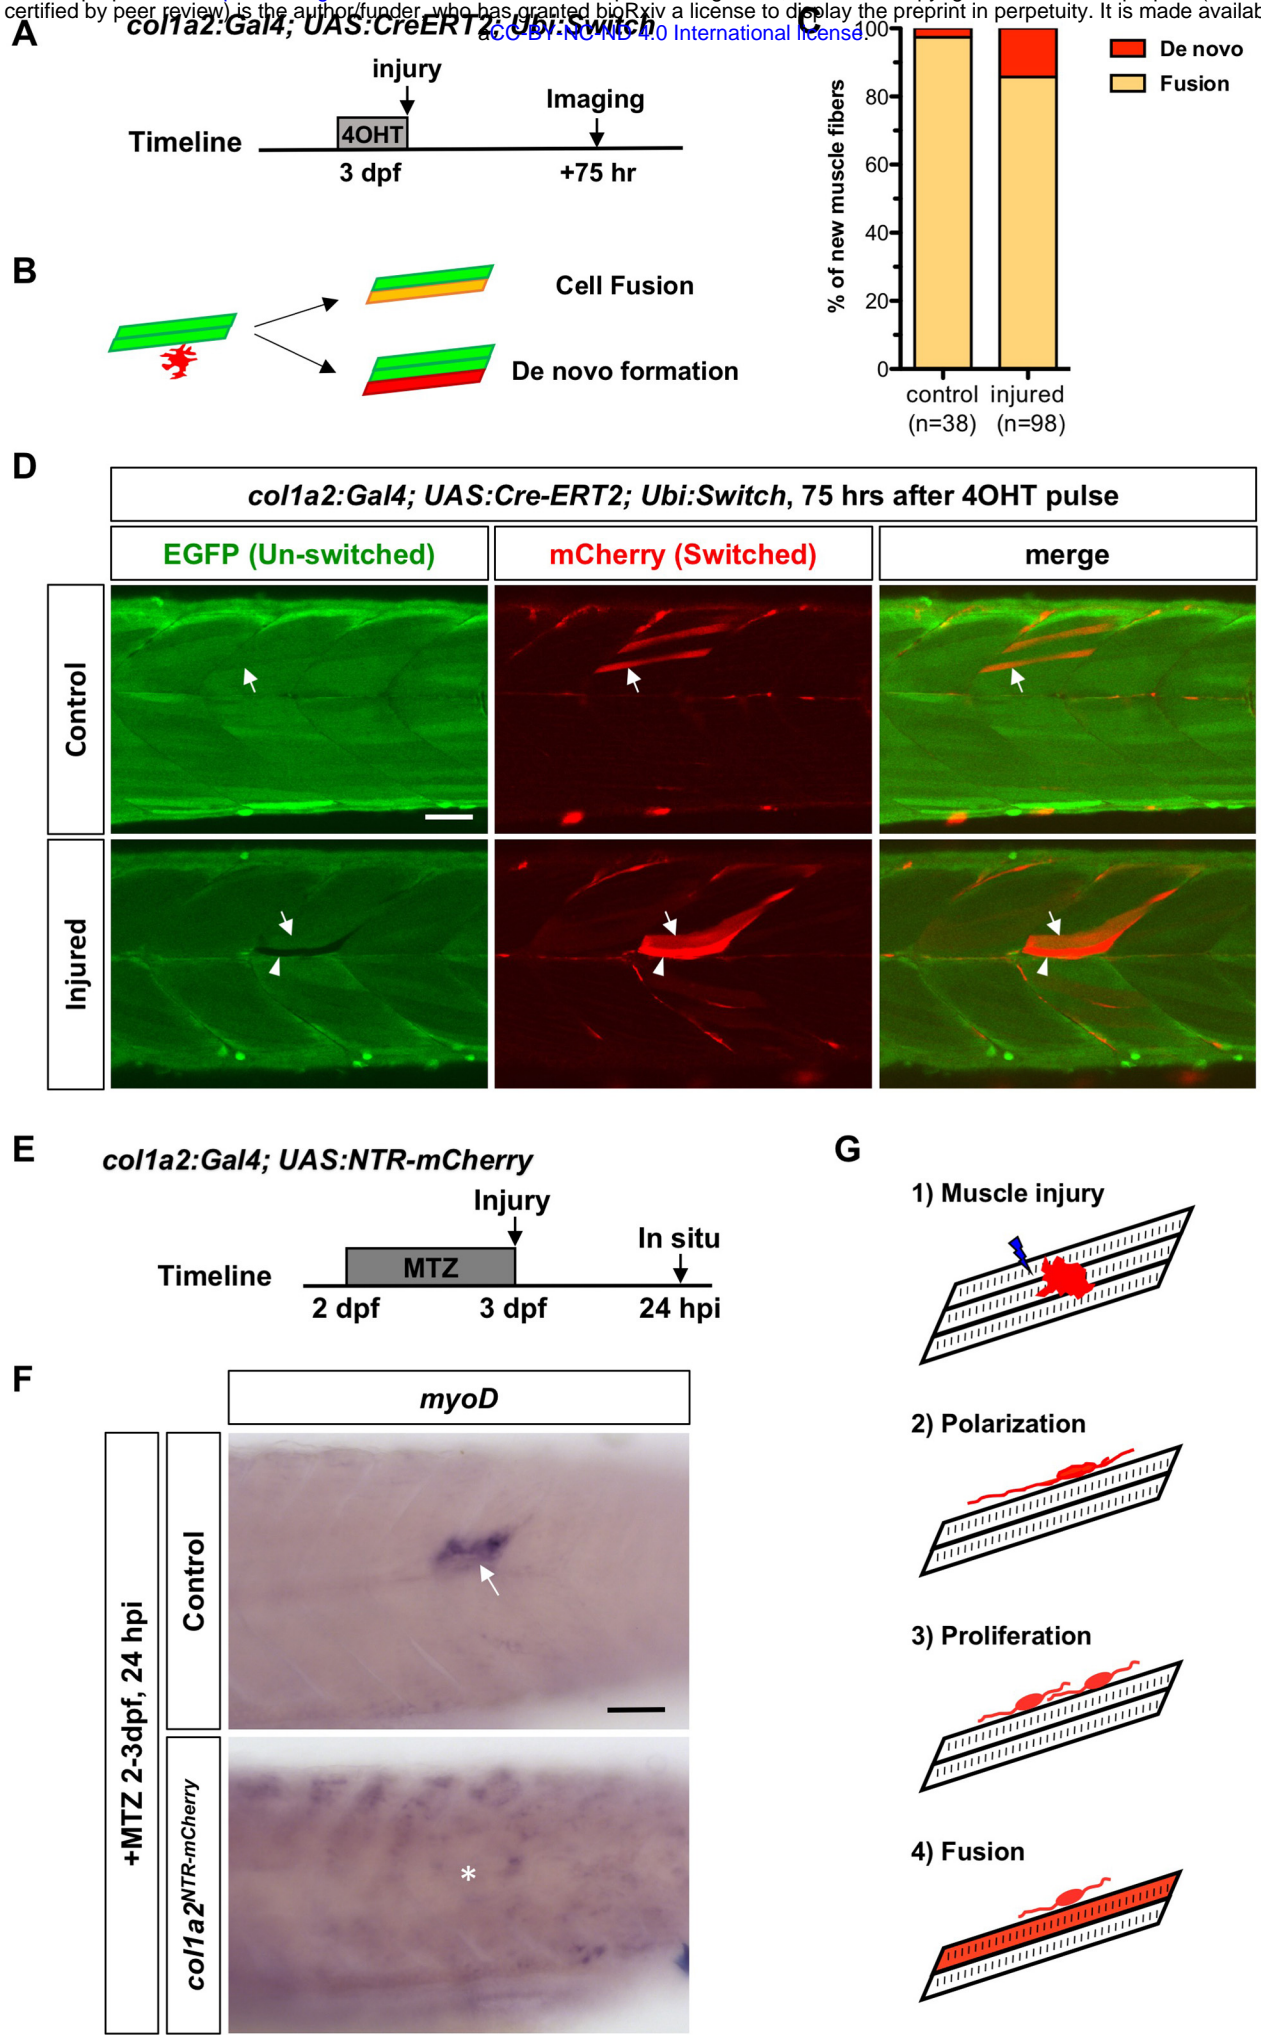

# Figure S1

bioRxiv preprint doi: <https://doi.org/10.1101/396713>; this version posted August 21, 2018. The copyright holder for this preprint (which was not certified by peer review) is the author/funder, who has granted bioRxiv a license to display the preprint in perpetuity. It is made available under aCC-BY-NC-ND 4.0 International license.

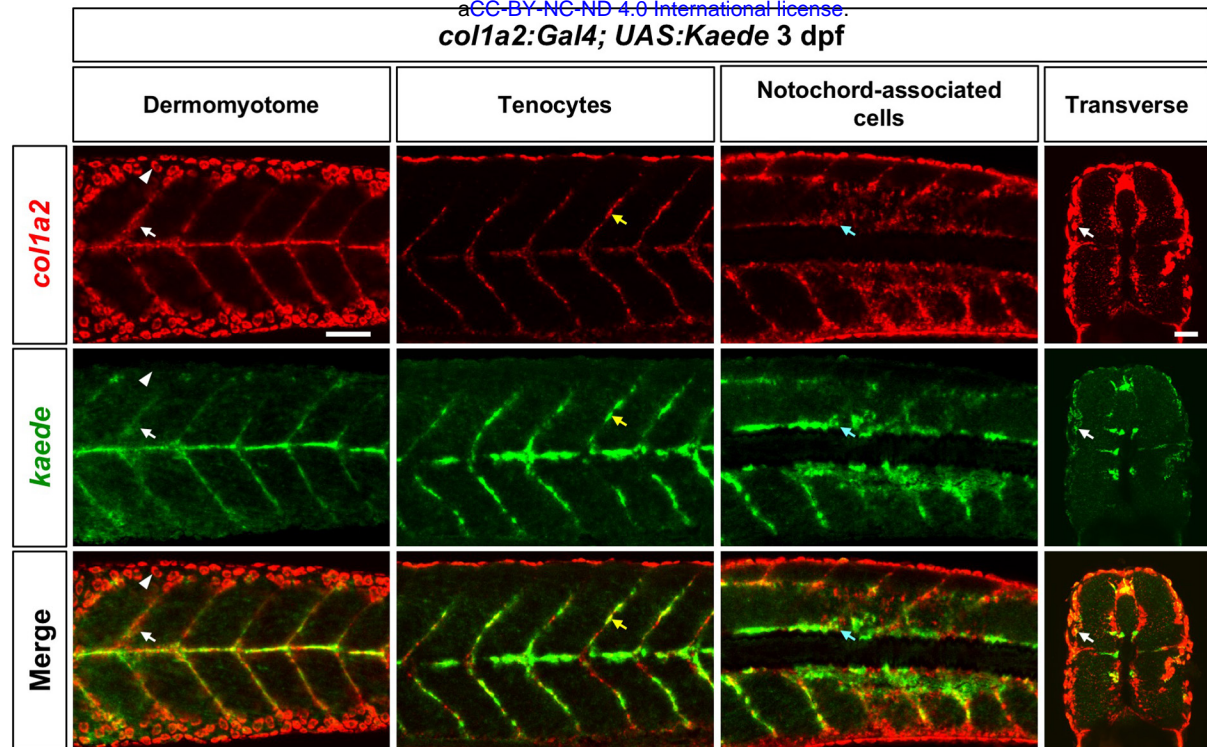

# Figure S2

bioRxiv preprint doi: <https://doi.org/10.1101/396713>; this version posted August 21, 2018. The copyright holder for this preprint (which was not certified by peer review) is the author/funder, who has granted bioRxiv a license to display the preprint in perpetuity. It is made available under aCC-BY-NC-ND 4.0 International license.

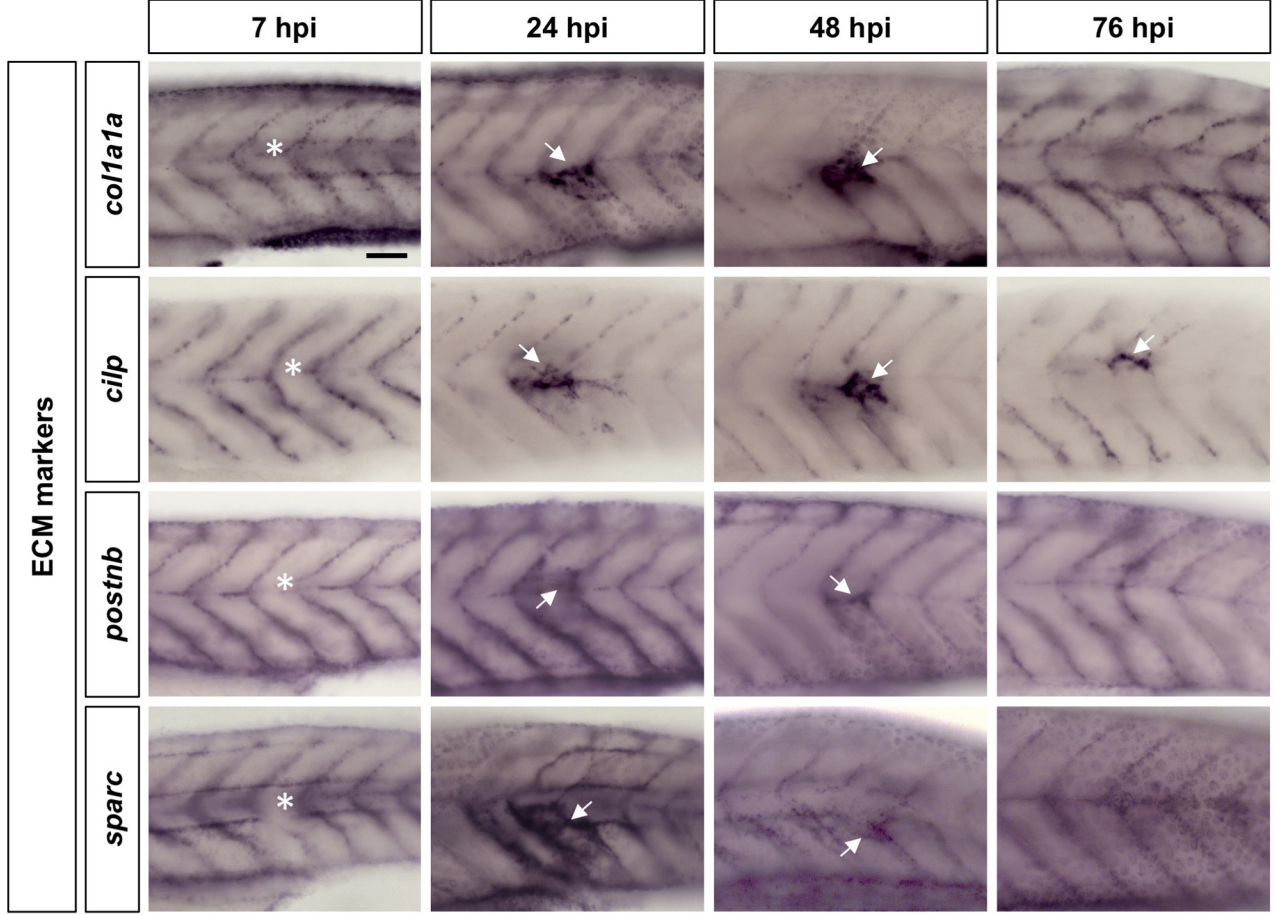

# Figure S3

bioRxiv preprint doi: <https://doi.org/10.1101/396713>; this version posted August 21, 2018. The copyright holder for this preprint (which was not certified by peer review) is the author/funder, who has granted bioRxiv a license to display the preprint in perpetuity. It is made available under aCC-BY-NC-ND 4.0 International license.

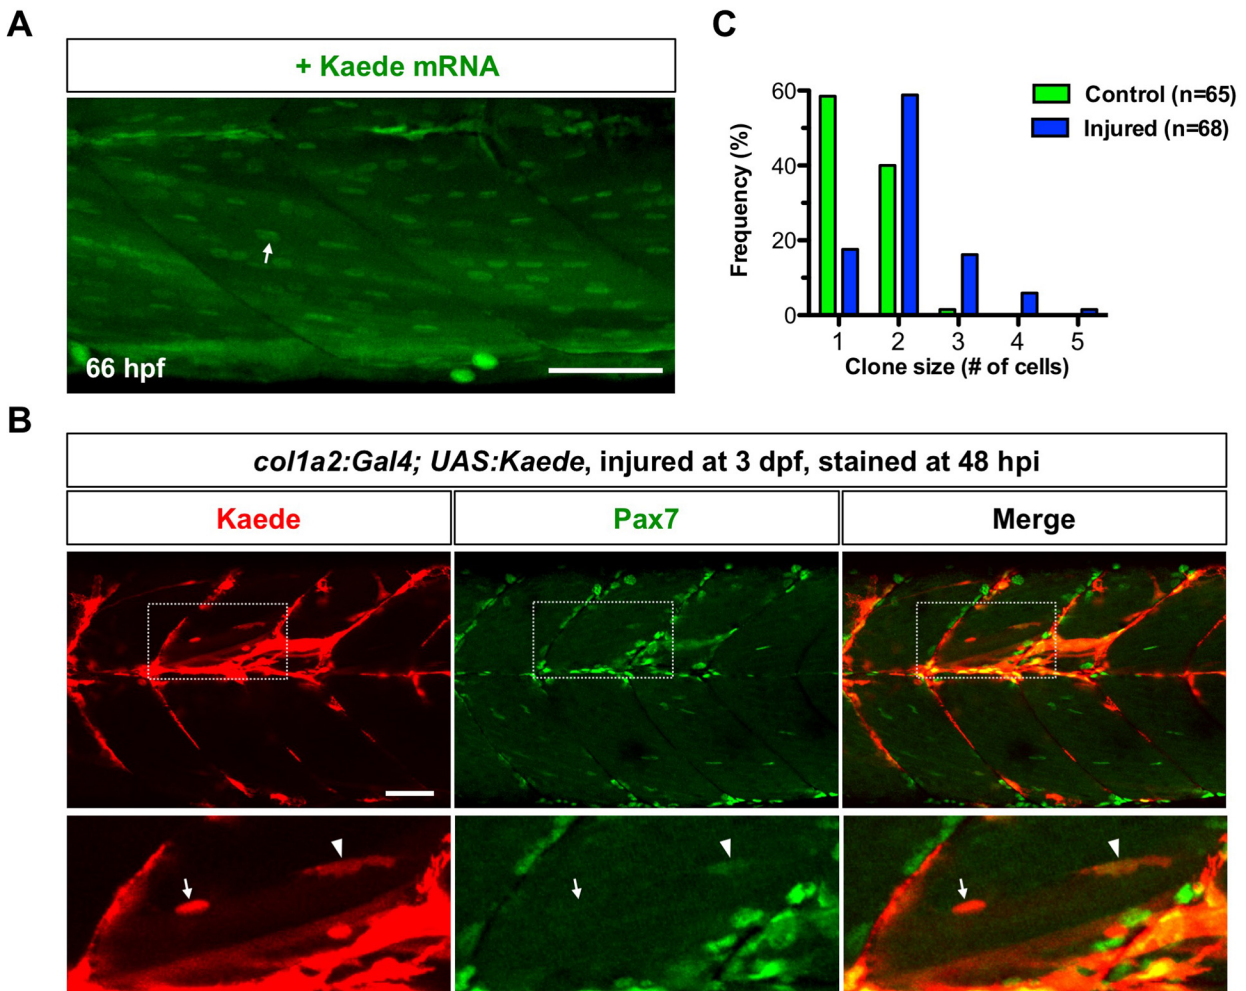

Source: https://www.biorxiv.org/content/10.1101/396713v1.full.pdf
